1     **The interaction of crossover formation and the dynamic architecture of the**  
2                                   **synaptonemal complex during meiosis**

3

4     Simone Köhler<sup>1,2,\*</sup>, Michal Wojcik<sup>3,4,\*</sup>, Ke Xu<sup>3,4,5,6,#</sup> and Abby F. Dernburg<sup>1,2,5,7,#</sup>

5

6         1. Department of Molecular and Cell Biology, University of California, Berkeley, Berkeley  
7             CA 94720-3220

8         2. Howard Hughes Medical Institute, 4000 Jones Bridge Road, Chevy Chase, MD 20815

9         3. Department of Chemistry, University of California, Berkeley, Berkeley CA 94720-3220

10        4. Chan Zuckerberg Biohub, San Francisco, CA 94158, USA

11        5. California Institute for Quantitative Biosciences, Berkeley CA 94720

12        6. Division of Molecular Biophysics and Integrated Bioimaging, Lawrence Berkeley  
13            National Laboratory, Berkeley, CA 94720

14        7. Division of Biological Systems and Engineering, Lawrence Berkeley National  
15            Laboratory, Berkeley CA 94720

16

17     \* these authors contributed equally to this work.

18     # corresponding authors:

19     Ke Xu <xuk@berkeley.edu>

20     Abby F. Dernburg <afdernburg@berkeley.edu >

21

22

23

24

25 **During meiosis, chromosomes pair with their homologous partners, and a structure known**  
26 **as the synaptonemal complex (SC) assembles between them. Evidence indicates that this**  
27 **material plays a role in regulating crossover recombination between homologs, although**  
28 **this remains controversial. Here we use three-dimensional STochastic Optical**  
29 **Reconstruction Microscopy (3D-STORM) to interrogate the molecular architecture of the**  
30 **SC in intact germline tissue from *Caenorhabditis elegans*, and analyze its ultrastructure**  
31 **during meiotic progression. Using a probabilistic mapping approach, we determine the**  
32 **position and orientation of the four known SC structural proteins. We report that a**  
33 **marked structural transition occurs within this material upon crossover designation. We**  
34 **also identify a mutation that disturbs both SC ultrastructure and crossover interference,**  
35 **the widespread mechanism that results in non-randomly wide spacing of crossovers**  
36 **between the same chromosome pair. Together with other evidence, our findings suggest**  
37 **that the SC is an active material, and that structural transitions may directly contribute to**  
38 **chromosome-wide crossover regulation.**

39

40 The synaptonemal complex (SC) is a protein structure that assembles between homologous  
41 chromosomes during meiotic prophase, stabilizing their parallel alignment [1]. The SC appears  
42 as a periodic ladder-like structure in electron micrographs [2]. Recent studies have revealed that  
43 this material shows dynamic, liquid-like behavior [3-7]. The SC is required for and appears to  
44 regulate meiotic recombination [3, 8-13]. Despite its central role in meiosis, the molecular  
45 organization of the SC remains poorly characterized.

46

47 In *C. elegans*, the SC assembles between homologs even in the absence of meiotic recombination  
48 [14]. Four structural proteins essential for SC assembly have been identified: SYP-1, SYP-2,  
49 SYP-3, and SYP-4 [15-18]. Limited information about their organization within the SC has been  
50 obtained through protein-protein interaction analysis and immuno-electron microscopy [19].  
51 Super-resolution microscopy has emerged as a powerful tool to investigate the organization of  
52 macromolecular assemblies, including the SC [20, 21]. We recently described the molecular  
53 architecture of meiotic chromosome axes, which form the substrate for SC assembly, based on  
54 3D-STORM [22, 23] in intact *C. elegans* gonads [24]. Here, we apply this approach to analyze  
55 the organization of the SC during meiotic prophase.

## 56 **Results**

57 Using antibodies that bind either short peptides within SC proteins or epitope tags inserted by  
58 genome editing, we localized the SYP proteins along paired meiotic chromosomes using 3D-  
59 STORM and averaging methods (Extended Data Fig. S1). The orientation of the SC in our  
60 images was defined by labeling a reference protein in the chromosome axes, HIM-3 [25]. For  
61 positional mapping of SC proteins, we analyzed regions that were observed in frontal view (Fig.  
62 1b, c). We rotated all images about the optical axis ( $z$ -axis) such that the chromosomes are  
63 extended along the  $y$ -axis, with the SC spanning the distance between the homologs on the  $x$ -axis  
64 (Extended Data Fig. S1b-c, methods). Taking advantage of the well-characterized progression of  
65 meiotic stages within the germline of adult *C. elegans*, we compared SC organization before,  
66 during and after the designation of crossover sites (Fig. 1a).

67

### 68 **Dynamic architecture of the synaptonemal complex in *C. elegans***

69 The width of the SC in  $x$  in *C. elegans*, as measured from electron micrographs, is  
70 approximately 96 nm [3]. An antibody recognizing the C-terminal peptide of SYP-1 was  
71 resolved as two parallel strands, located at  $42.3 \pm 0.8$  nm and  $42.0 \pm 1.2$  nm off-center in early and  
72 late pachytene, respectively (Fig. 1b, m). This epitope thus lies near the outer edges of the SC  
73 and within a few nanometers of HIM-3, the most proximal known component of the  
74 chromosome axis (Table S1)[24]. Intriguingly, in cross-sectional views ( $xz$ -view, Fig. 1c) we  
75 observed striking differences in its distribution in  $z$  between early and late pachytene SCs: While  
76 the C-terminus of SYP-1 was confined near the central plane in early pachytene, it was widely  
77 distributed in  $z$  in late pachytene (Fig. 1d, e, m, center and Table S1).

78 We then asked whether the N-terminus of SYP-1 is similarly relocalized during meiotic  
79 progression. Tagging the N-terminus of SYP-1 disrupts SC assembly ([26] and data not shown),  
80 but we identified a poorly conserved region close to the N-terminus in which insertion of an HA  
81 epitope did not impair function (Table S2). Interestingly, this epitope was confined to a thin  
82 plane in the center of the SC along both the  $x$  and  $z$  axis in both early and late pachytene SCs  
83 (Fig. 1d, e, m, top). Our data support a transverse orientation for SYP-1, as previously reported  
84 [19], with its N-terminus at the center and C-terminus near the axes. Thus, SYP-1 appears to be  
85 an ortholog of “transverse filament” proteins from other organisms [27-31]. Importantly, these  
86 localization data are inconsistent with a uniform growth in thickness of the SC through e.g.

87 lateral stacking of SYP-1 molecules during meiotic progression, which has previously been  
88 suggested based on observations of increased fluorescence intensity during late pachytene in  
89 budding yeast [4] and *C. elegans* [5]. The distinct localization patterns of N- and C-terminal  
90 epitopes in early and late SCs along the  $z$  axis suggest a more complex reorganization of SYP-1  
91 during meiosis.

92 To further probe the orientation of SYP-1 within the SC, we mapped the N-terminal  
93 localization events to the C-terminal distributions, assuming a rigid, rod-like conformation (Fig.  
94 S2a-b, see methods). Our approach indicated that SYP-1 lies nearly parallel to the SC in early  
95 pachytene, but is diagonally oriented in late pachytene (Fig. 2a-b).

96 We next asked how the organization of other SC components was affected by meiotic  
97 progression. We mapped the C-termini of SYP-2, SYP-3-HA and SYP-4-HA, the N-terminus of  
98 GFP-SYP-3[32], and an epitope inserted into the middle of SYP-4 (Table S2, Fig. 1d, e, m and  
99 Extended Data Fig. S3). The results are summarized in Table S1. We observed consistent  
100 differences between early and late pachytene for most epitopes, particularly for the C-terminus of  
101 SYP-4, which moves from a central plane in early pachytene to a splayed orientation, protruding  
102 above and below the central plane of the SC, in late pachytene (Fig. S2c and S3, Table S1).  
103 Similarly, epitopes on SYP-2 and SYP-3 were more central in early pachytene than late  
104 pachytene (Fig. 1d,e,m, S2c and Fig. S3). We further found that SYP-3 localized at (N) or close  
105 to (C) the midline of the SC in  $x$ , suggesting a head-to-head arrangement of SYP-3 molecules  
106 (Fig. S3 and Table S1). These findings are inconsistent with one conclusion of a previous study,  
107 that the C-terminus of SYP-3 lies in proximity to the axes [19]. This discrepancy may reflect the  
108 challenges of determining the orientation of the SC in samples prepared for immuno-EM.  
109 Overall, 3D-STORM imaging and probabilistic modeling provide new insights into SC  
110 ultrastructure and reveal a marked reorganization of SC components during meiotic progression  
111 (Fig. S2c).

## 112 **Crossover formation is accompanied by a change in synaptonemal complex organization**

113 Programmed double-strand breaks (DSBs) are generated during early prophase. A subset  
114 eventually gives rise to crossover (CO) recombination events. In *C. elegans* each pair of  
115 homologous chromosomes undergoes only a single CO, while all other breaks are repaired to  
116 yield noncrossover products. Some of the key signaling molecules that regulate CO site selection



117 localize to the SC [3, 11-13, 33, 34], and the integrity of this structure is important for CO  
118 regulation [9]. Previous work from our group revealed that the SC behaves as a liquid crystal[3],  
119 suggesting that diffusing signals and/or structural transitions could be propagated through this  
120 material [35]. Interestingly, recent evidence suggests that the central region of the SC grows in  
121 length and/or thickness throughout the pachytene stage of meiotic prophase, and that SC proteins  
122 may become more stably associated with this structure upon crossover formation [4-7, 9]. Thus,  
123 we wondered whether the dramatic reorganization of the SC during meiotic prophase might be  
124 linked to crossover formation and might provide a structural basis for the SC's role in CO  
125 regulation. We therefore first asked whether the timing of SC reorganization coincides with CO  
126 designation. In *C. elegans*, designated crossovers can be visualized as bright GFP-COSA-1 foci,  
127 which are first detected in mid-pachytene [36] (Fig. 1a). To test whether the structural transition  
128 within the SC coincides with the appearance of bright GFP-COSA-1 foci, we imaged nuclei at  
129 mid-pachytene within intact gonads. We inferred the crossover designation status of individual  
130 nuclei based on the detection of bright COSA-1 foci and classified them as either mid(-)  
131 pachytene or mid(+) pachytene. Throughout mid-pachytene, SYP-1 retains its transverse  
132 orientation and both N- and C-termini of SYP-1 are widely distributed in *z* (Fig. 1f,g,m and  
133 Table S1). This is consistent with a lateral stacking of SYP-1 molecules in parallel orientation, as  
134 observed in early pachytene (Fig. 2a,b). However, the distance of the C-termini of SYP-1 from  
135 the central axis of the SC in frontal view was drastically lower in mid(+) pachytene nuclei  
136 compared to SCs in mid(-) pachytene nuclei.

137 This indicates that the designation of COs coincides with a conformational switch within  
138 the SC. To take an unbiased approach to analyze the dynamics of SC organization during meiotic  
139 prophase, we employed principal component analysis (PCA) of SYP-1 and SYP-2 distributions  
140 (see methods). The first dimension in the PCA, indicative of the main changes within the SC  
141 across different stages during meiotic prophase, corresponds to the transition from early to late  
142 pachytene SCs (Fig. 2c). Mid(+) pachytene SCs are similar to late pachytene SCs along the first  
143 principal component, while mid(-) SCs are in between early and late pachytene SCs, indicating  
144 that the SC is reorganized upon CO designation.

145 In *C. elegans*, designation of COs triggers the asymmetrical remodeling of chromosome  
146 axes and the SC to create two domains on either side, known as the long and the short arm.  
147 Downstream steps in this differentiation require the recruitment of the Polo-like kinase PLK-2 to

148 the SC [5, 37, 38]. To assess whether the changes we observe in SC ultrastructure are dependent  
149 on crossover designation and/or the subsequent remodeling processes, we determined the  
150 organization of the SC in *zhp-3(jf61)* null mutants, which lack crossovers [39], and in *plk-*  
151 *2(ok1936)* null mutants, which are proficient for CO designation but show pronounced delays in  
152 downstream remodeling and arm differentiation [5, 7, 37, 40], although they do eventually  
153 segregate most chromosomes properly [38]. We found that SCs in late pachytene in *zhp-3(jf61)*  
154 mutants resembled those in early pachytene nuclei in wild-type hermaphrodites, while SCs at late  
155 pachytene in *plk-2(ok1936)* mutants are very similar to wild-type (Fig. 1h,i,n, 2 and Fig. S3c,e).  
156 Thus, structural reorganization of the SC requires CO designation but is independent of PLK-2.  
157 We note that PLK-2 also plays an early role in homologous pairing and synapsis [37, 40], and our  
158 super-resolution images reveal severe defects in SC architecture in *plk-2(ok1936)* null mutants  
159 despite the overall similarity to wild-type late pachytene SCs (Fig. 1i, n). Similarly, while the  
160 global SC architecture in *zhp-3(jf61)* mutants resembled early pachytene SCs in wild type, the  
161 SC increased in thickness along the optical axis during pachytene in *zhp-3(jf61)* oocytes, based  
162 on the spatial distribution of SYP-1 (Fig. 1h, n), consistent with the continuous incorporation of  
163 SC subunits even in the absence of crossover formation [5]. In summary, our data indicate that  
164 the SC grows in thickness from early to late pachytene independent of crossovers, while the  
165 reorganization of SC ultrastructure requires and coincides with CO designation.

166

### 167 **Defects in SC organization are linked to defects in crossover interference**

168 The SC plays a critical role in regulating the number and distribution of CO  
169 recombination events [3, 8, 9, 12, 13]. We therefore wondered whether reorganization of the SC  
170 is linked to CO regulation. Fortuitously, in our efforts to isolate a functional C-terminally tagged  
171 *syp-4* allele, we identified an unusual, partially functional allele, *syp-4(ie25)* (Fig. 3a). In *syp-*  
172 *4(ie25)* homozygotes, we observed timely homologous synapsis, as determined by the length of  
173 the transition zone, which corresponds to the leptotene and zygotene stages of meiosis. Six  
174 bivalents were consistently observed at diakinesis, indicative of CO formation on all six  
175 chromosome pairs (Fig. 3b, c, e). However, super-resolution microscopy indicated that the  
176 architecture of the SC was drastically altered in *syp-4(ie25)* late pachytene after crossover  
177 formation (Fig. 1l and 2, Extended Fig. S3). SYP-1 lies in a highly tilted orientation (Fig. 2a,b)  
178 and the overall conformation of the SC in *syp-4(ie25)* at late pachytene is clearly distinct from

179 any conformation in wild-type animals in our principal component analysis (Fig. 2c). In contrast,  
180 early pachytene SCs in *syp-4(ie25)* are more reminiscent of SC conformation of prior to CO  
181 formation in wild-type animals (Fig. 1k and 2). These data suggest a strong defect in SC  
182 organization in *syp-4(ie25)* that is exacerbated upon CO designation (Fig. 2c).

183 Notably, *syp-4(ie25)* mutant hermaphrodites exhibited high frequencies of chromosome  
184 missegregation, resulting in embryonic lethality ( $38\pm 4\%$  survival, compared to 104% in wild-  
185 type) and male self-progeny ( $6\pm 1\%$  compared to 0.1% in wild-type, Table S2), albeit less severe  
186 than in a *syp-4(tm2713)* deletion allele (2.5% viability and 40% males) [18]. Importantly,  
187 crossover formation was severely impacted in *syp-4(ie25)*: We observed a slight delay in meiotic  
188 progression, indicated by a modest extension of CHK-2 kinase activity [41] (Fig. 3d) and an  
189 accumulation of RAD-51 foci, which mark unrepaired recombination intermediates (Extended  
190 Data Fig. S4). Moreover, the structure of bivalents at diakinesis was altered in *syp-4(ie25)*  
191 oocytes (Fig. 3f), indicating that crossover formation might be affected [42, 43].

192 To better characterize the effects of *syp-4(ie25)*, we imaged GFP-COSA-1 to quantify  
193 designated crossover sites at late pachynema [36]. Wild-type animals display a single bright  
194 GFP-COSA-1 focus on each of the 6 chromosome pairs, even when the number of DSBs is  
195 markedly increased [36, 42]. In contrast to the  $6\pm 0.2$  (s.d.) GFP-COSA-1 foci we observed in  
196 wild-type and heterozygous *ie25/+* animals, we observed  $10.9\pm 1.7$  GFP-COSA-1 foci at late  
197 pachytene in homozygous *syp-4(ie25)* hermaphrodites (Fig. 3g, h). This suggested that crossover  
198 interference, which in wild-type animals acts over distances longer than any single chromosome  
199 [9, 42], is greatly decreased in *syp-4(ie25)* homozygotes. To test this hypothesis, we use two  
200 different metrics to quantify the crossover interference strength, the gamma factor [44] and the  
201 coefficient of coincidence [45]. Each of these approaches confirmed that crossover interference  
202 is severely reduced or absent in *syp-4(ie25)* mutants (Fig. 3i,j).

203 To verify that GFP-COSA-1 foci indeed correspond to designated crossover sites in wild-  
204 type and *syp-4(ie25)* animals, we also measured crossing-over genetically using whole genome  
205 sequencing (see methods). This confirmed that crossovers in *syp-4(ie25)* homozygotes match the  
206 number of GFP-COSA-1 foci. Thus, *syp-4(ie25)* mutants are proficient for synapsis, yet they  
207 exhibit drastic alterations in SC architecture and cannot impose normal crossover interference.

208 Crossover interference acts along the physical length of the synapsed chromosomes, and  
209 in some organisms chromosomes with longer axes undergo more crossovers than chromosomes

210 with shorter axes [46-49]. Therefore, we next asked whether the axis length is increased in *syp-*  
211 *4(ie25)* mutants. Interestingly, axes in *syp-4(ie25)* mutants are shorter than in wild-type animals.  
212 Thus, changes in axis length cannot account for the observed increase in COs in *syp-4(ie25)*  
213 mutants. We hypothesize that the increase in CO number may be caused by the defects in SC  
214 organization in *syp-4(ie25)* mutants.

215 Partial depletion of SC proteins in *C. elegans* by RNAi can result in a slight increase in  
216 the number of crossovers, to about 7 GFP-COSA-1 foci per nucleus [9]. Thus, we tested whether  
217 the defect in crossover regulation in *syp-4(ie25)* can be attributed to reduced levels of SC  
218 proteins. The abundance of an epitope-tagged HA-SYP-1 was not altered by the *syp-4(ie25)*  
219 mutation (Fig. S5a). However, the immunofluorescence signal of SYP-1 and SYP-2 was reduced  
220 in *syp-4(ie25)*, although staining appeared contiguous along the chromosomes (Fig. S5b, c). This  
221 indicates the *syp-4(ie25)* mutation impairs assembly of SYP proteins between chromosomes. In  
222 contrast, we also isolated a mutant, *syp-4(ie27)* (Fig. S6a), which reduced expression levels of  
223 SYP-4-HA to about 30% of wild-type (Fig. S6c). Both the transition zone and CHK-2 active  
224 zone were extended in *syp-4(ie27)* single mutants, indicating that completion of synapsis and CO  
225 designation were delayed (Fig. 3c-d, Fig. S6b, d). We also observed a slight increase in the  
226 number of GFP-COSA-1 foci to  $7 \pm 1.1$  (Fig. S6e, Fig. 3g), which is comparable to results  
227 obtained for partial depletion of SYP-1, -2 or -3 by RNAi [9], but distinct from our results for  
228 *syp-4(ie25)*. This indicates that the defects in crossover interference in *syp-4(ie25)* are not a mere  
229 consequence of reduced protein expression.

230 To test whether the defects in SC ultrastructure can account for the effects of *syp-4(ie25)*  
231 on crossover regulation, we investigated the role of *syp-4(ie25)* in the regulation of COSA-1 foci  
232 within aggregates of SC proteins known as polycomplexes. These bodies self-assemble prior to  
233 or after synapsis in many organisms, including in early meiotic nuclei in *C. elegans*. Large  
234 polycomplexes also assemble in meiotic nuclei in worms lacking the axis protein HTP-3, and  
235 show periodic striations in orthogonal directions that correspond precisely to the width and  
236 longitudinal banding of the SC [3, 50]. Intriguingly, we have found that polycomplexes in *htp-3*  
237 null mutants recapitulate key aspects of the spatial patterning of CO proteins normally seen along  
238 SCs, although these mutant animals lack DSBs and meiotic recombination intermediates.  
239 Specifically, at late pachytene, most polycomplexes display a single COSA-1 focus ( $1.1 \pm 0.2$ ;  
240 Fig. 4a, b) [3]. When we combined the *syp-4(ie27)* mutation, which reduces expression of SYP-

241 4, with  $\Delta htp-3$ , this resulted in smaller polycomplexes, but they showed an identical number of  
242 GFP-COSA-1 foci at late pachytene ( $1.1 \pm 0.2$ ) (Fig. 4a, b). By contrast, when *syp-4(ie25)* was  
243 combined with  $\Delta htp-3$ , multiple GFP-COSA-1 foci ( $2.1 \pm 0.8$ ) were associated with each  
244 polycomplex (Fig. 4a, b), mirroring the  $\sim 2$ -fold increase in GFP-COSA-1 foci observed along  
245 bona fide SCs in *syp-4(ie25)* mutants.

246 We thus interrogated the organization of polycomplexes in *syp-4(ie25)* by EM. While  
247 structures resembling the electron-dark lateral and brighter, striated central regions were  
248 observed in  $\Delta htp-3 syp-4(ie25)$ , the overall organization was dramatically altered: polycomplexes  
249 appeared to be internally fragmented, rather than maintaining constant orientation over hundreds  
250 of nm, as in “normal” polycomplexes [3] (Fig. 4c), and the distance between parallel electron-  
251 dark bands was much narrower ( $46.3 \pm 1.2$  nm, vs  $97.6 \pm 1.5$  nm in  $\Delta htp-3$  polycomplexes, Fig.  
252 4c). This likely reflects differences in organization and/or orientation of SYP proteins within  
253 polycomplexes. Overall, the disorganized structure of polycomplexes in  $\Delta htp-3 syp-4(ie25)$  in  
254 EM is reminiscent of the architecture of SCs in *syp-4(ie25)* determined by 3D-STORM. These  
255 findings indicate that structural defects within polycomplexes are sufficient to alter special  
256 patterning of CO proteins, analogous to the structurally altered SCs that assemble in *syp-4(ie25)*  
257 mutants.

258

## 259 Discussion

260 Together these findings establish that the correct organization of the synaptonemal  
261 complex is required for spatial patterning of crossovers, and further corroborate previous  
262 findings that the SC is important for crossover interference. They further suggest that CO  
263 regulation may involve transduction of structural information through this liquid crystalline  
264 material. This idea is reminiscent of a “beam-film” model for crossover interference, which  
265 proposes that crossovers relieve local stress along a beam-like material [49, 51]. This mechanical  
266 stress has been proposed to be imposed by chromatin structure and/or tethering of chromosomes;  
267 however, our findings reinforce previous studies that implicated the SC as a crucial mediator of  
268 crossover patterning [8, 9, 12]. In particular, we have reported that polycomplexes comprised of  
269 SC central region proteins alone can mediate spatial patterning of GFP-COSA-1 foci even in the  
270 absence of association with chromatin or axis proteins, and polycomplexes in *syp-4(ie25)*  
271 mutants exhibit both defects in their internal organization and altered patterning of GFP-COSA-1

272 foci. Interestingly, forces applied to nematic liquid crystalline materials such as the SC [3] can  
273 perturb the orientation of molecules within the liquid crystal [35]. Therefore, we speculate that  
274 the reorganization of proteins within the SC that occurs concomitant with CO designation may  
275 reflect a mechanical signaling component of CO interference.  
276



277

278 **Figures**

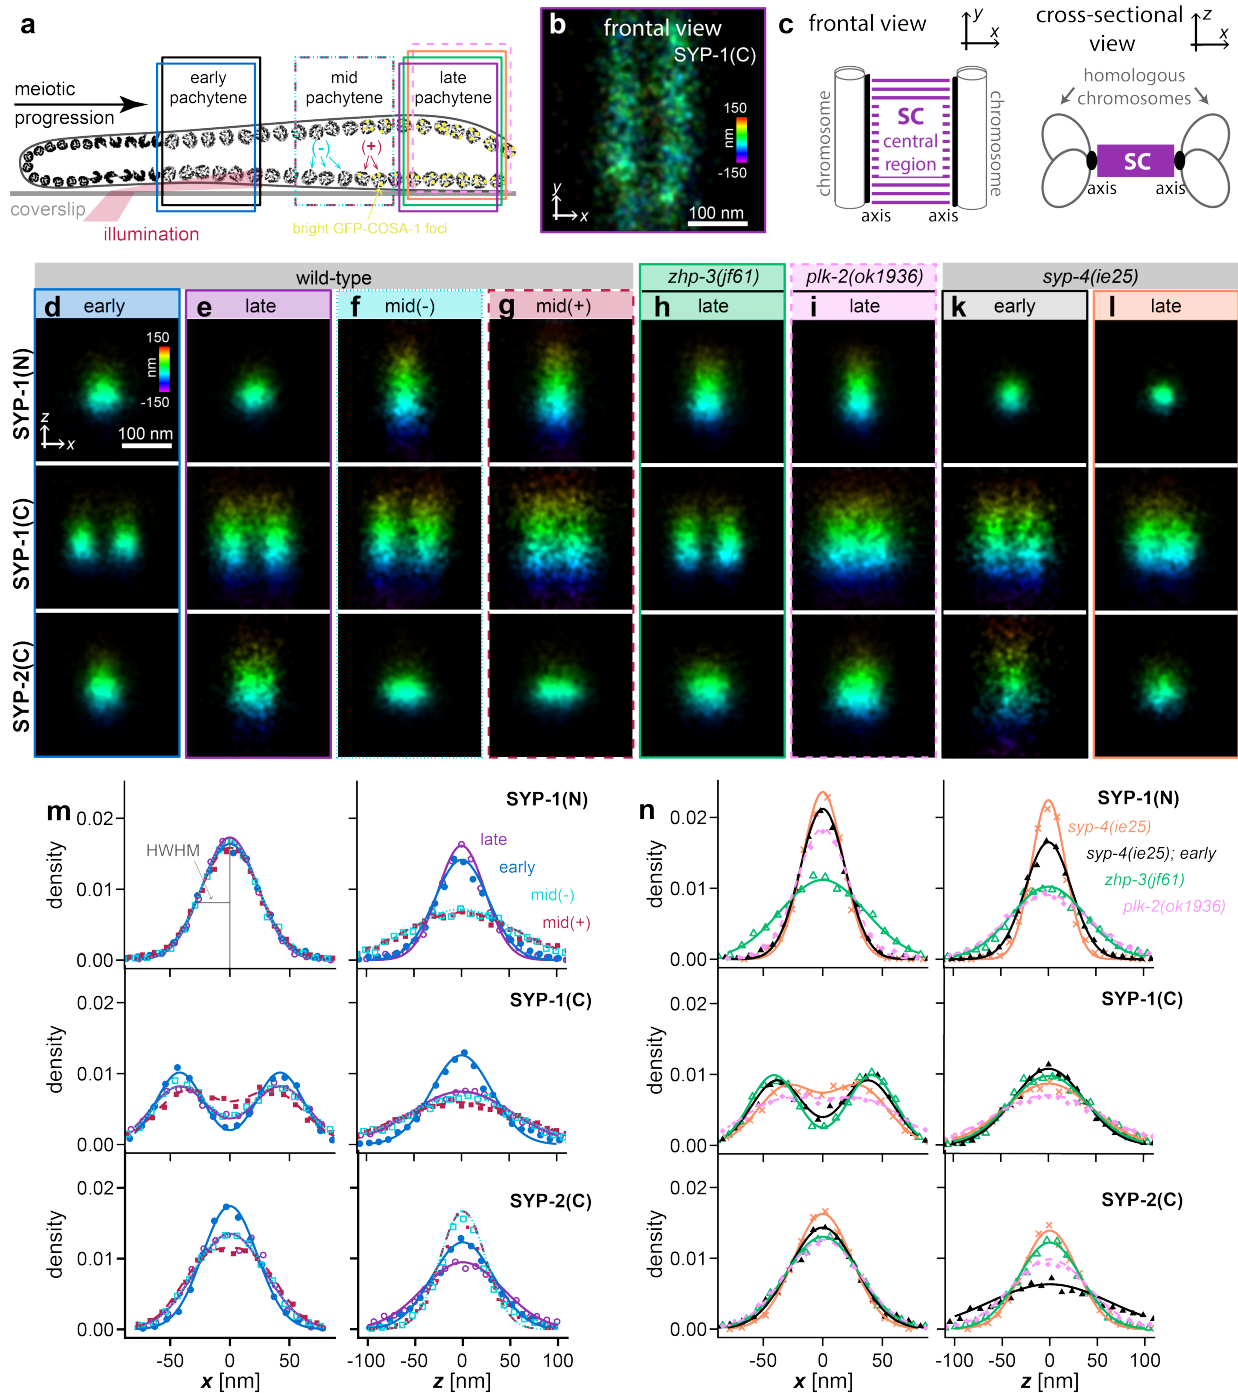

279

280

281 **Figure 1: Super-resolution microscopy reveals the dynamic three-dimensional organization**

282 **of the synaptonemal complex.** (a) In the *C. elegans* gonad, nuclei (representative DAPI images)

283 are arranged in a gradient of premeiotic and meiotic stages. Using highly inclined illumination



284 (red), we imaged SCs in the bottom section of nuclei adjacent to the coverslip (gray) in early,  
285 mid- and late pachytene (rectangles). Mid(-) (cyan) and mid(+) (red) pachytene correspond to  
286 nuclei without and with bright GFP-COSA-1 foci in the same field of view, respectively. (b)  
287 Measurements based on averaged STORM images indicate that the C-terminus of SYP-1 lies  
288 close to the chromosome axes. Colors denote localizations in  $z$  from -150 to 150 nm (color scale  
289 bar). (c) The schematic depicts the SC, which forms a ladder-like structure approximately 100-  
290 nm wide (purple), which links the axes (black) of paired homologous chromosomes (white rods)  
291 in the frontal view (left). To visualize the 3D architecture of the SC, we show cross-sectional  
292 views of the SC as depicted (right). (d-l) Averaged cross-sectional views of STORM images for  
293 the N-terminus of HA-SYP-1 (top row), the C-terminus of SYP-1 (center row), and C-terminus  
294 of SYP-2 (bottom row), for wild-type SCs in early (d, blue closed spheres in m), late (e, purple  
295 closed spheres in m), mid(-) (f, cyan open squares in m), and mid(+) (g, red closed squares in m)  
296 pachytene and for *zhp-3(jf61)* (h, green triangles, late pachytene in n), *plk-2(ok1936)* (i, pink  
297 diamonds in n, late pachytene) and *syp-4(ie25)* (k, black closed triangles for early pachytene  
298 orange crosses in late pachytene in n). (m, n) Histograms of localization events in frontal view  
299 ( $x$ , left) and across the SC ( $z$ , right) are fitted with 1 or 2 Gaussians. The results of the fits are  
300 summarized in Extended Data Table S1.

301

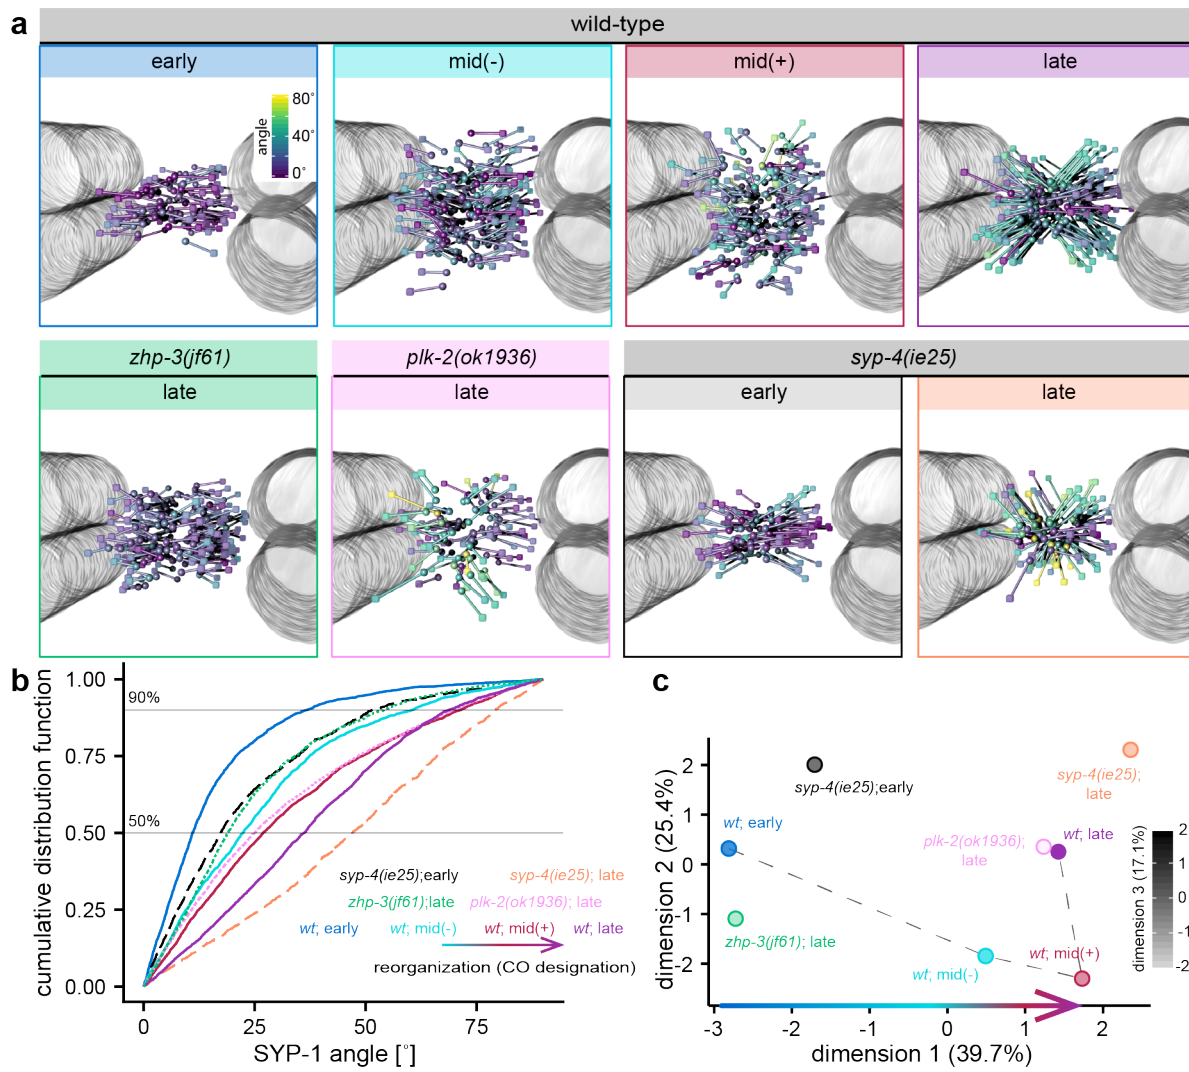

302

303 **Figure 2: The synaptonemal complex undergoes a structural transition upon crossover**  
 304 **designation.** (a) The stochastic nature of STORM does not allow us to image the N- and C-  
 305 terminus of a specific single molecule at the same time but will yield population averages for the  
 306 localization of individual domains. We therefore used a probabilistic mapping approach to  
 307 reconstruct the orientation of SYP-1 molecules for each condition and genotype. The resultant  
 308 models of SYP-1 (black) are shown with C-termini depicted as cubes and N-termini as spheres.  
 309 A proxy for chromatin (gray areas) is added for visualization purposes. Models are rendered  
 310 using POV-ray (v3.7.0). Models show changes in the orientation of SYP-1 upon crossover  
 311 formation. (b) These changes are revealed by the distributions of angles of SYP-1 with respect to  
 312 the central plane of the SC in cross-sectional views. Cumulative distribution functions are  
 313 shown. Gray horizontal lines mark median (50%) and 90<sup>th</sup> percentile values. (c) A principal  
 314 component analysis (see methods) summarizes the SC organization at different conditions and

315 genotypes. The progression of SC reorganization in wild-type animals throughout pachytene is  
316 highlighted by a gray dashed line. Dimension 1 scales with SC reorganization upon crossover  
317 formation (colored arrow). We note that mid(-) SCs prior to designation of COs marked by  
318 bright GFP-COSA-1 foci are closer to late pachytene than early pachytene. This suggests that  
319 some aspects of the transition in SC reorganization may occur even prior to the appearance of  
320 GFP-COSA-1 foci and/or nuclei designated mid(-) pachytene may include false negatives given  
321 that our field of view in *z* is limited to 1  $\mu$ m slices and does not contain whole nuclei. SC  
322 organization in late pachytene *zhp-3(jf61)* mutants that lack CO formation is similar to wild-type  
323 early pachytene, while SCs in *plk-2(ok1936)* null mutants resemble wild-type SCs. By contrast,  
324 SCs in *syp-4(ie25)* mutants are distinct in both early and late pachytene.

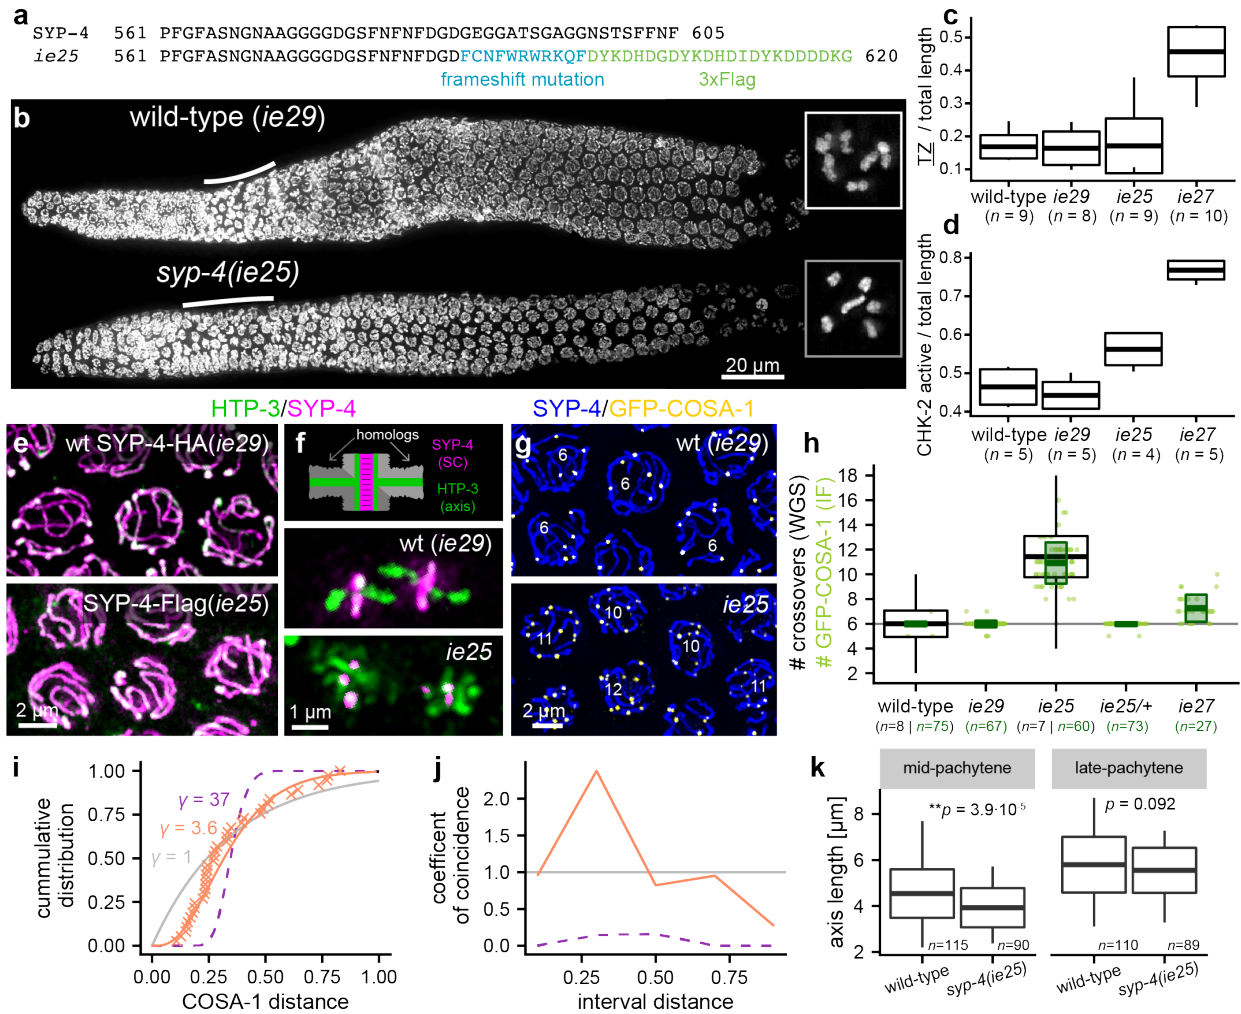

325

326

327 **Figure 3: Crossover interference is diminished in *syp-4(ie25)* mutants.** (a) The C-terminal  
328 amino-acid sequences of wild-type SYP-4 and SYP-4(*ie25*) are indicated. (b) Fluorescence  
329 micrographs of DAPI-stained gonads from wild-type (*syp-4-ha(ie29)*, top) and *syp-4(ie25)*  
330 mutants (bottom). Insets depict single oocyte nuclei, revealing 6 bivalents in both wild-type and  
331 *syp-4(ie25)*. (c) The *syp-4(ie25)* mutation or epitope tagging of *syp-4* alone (*ie29*) did not perturb  
332 the length of the transition zone (solid lines in b), but this length was significantly increased in  
333 *syp-4-ha(ie27)* mutants, indicative of a defect in synapsis. (d) Immunofluorescence detection of a  
334 CHK-2-dependent phosphoepitope provides a more consistent assay for meiotic progression. In  
335 animals homozygous for the *syp-4-HA* allele *ie29*, this “CHK-2 active” zone comprises 45% of  
336 the length of the germline containing leptotene, zygotene and pachytene stages of meiosis. This  
337 fraction was extended to 56% and 77% in *ie25* and *ie27*, respectively. Boxplots in c and d show  
338 mean $\pm$ s.d (whiskers show minima and maxima). (e) Fluorescence micrographs reveal robust  
339 synapsis for *ie29* (top) and *ie25* (bottom). (f) The cruciform bivalent structure, as illustrated in  
340 the cartoon (top) is disrupted in *ie25*, likely reflecting the occurrence of multiple crossovers per

341 chromosome pair. Immunostaining of HTP-3 (axis; green) and SYP-4 (SC; magenta) is shown  
342 (e-f). (g) The number of crossovers per nucleus as estimated from whole genome sequencing  
343 (black/white boxplots, mean±s.e., whiskers are extreme values) correspond to the number of  
344 GFP-COSA-1 foci (green dots and boxplots, mean±s.d.). (h) Fluorescence micrographs show a  
345 marker for designated crossovers, GFP-COSA-1 (yellow), and SYP-4 (blue). (i) To measure  
346 crossover interference strength, we fit the cumulative distribution function of inter-GFP-COSA-1  
347 distances in *syp-4(ie25)* mutants (orange crosses) using a gamma function[44].  $\gamma=1$  denotes no  
348 interference (gray),  $\gamma=37$  corresponds to interference measured for wild-type animals[9] (purple  
349 dashed line), while interference in *syp-4(ie25)* is severely reduced to  $\gamma=3.5$  (orange line,  $n=41$   
350 chromosomes). (j) Likewise, interference strength can be described by the coefficient of  
351 coincidence[45], which denotes the ratio of the observed number of 2 COs (GFP-COSA-1 foci)  
352 at a given distance to the expected number assuming random CO distribution. In wild-type  
353 animals, the coefficient of coincidence of GFP-COSA-1 foci is 0 corresponding to complete  
354 interference (purple dashed line;  $n=88$  chromosomes), while it is approximately 1 in *syp-4(ie25)*  
355 mutants (orange,  $n=41$ ), indicating no interference (gray line). (k) Chromosome axes lengths are  
356 shorter in *syp-4(ie25)* mutants compared to wild-type axes in mid(-)-pachytene prior to  
357 designation of CO sites (left) and comparable in late pachytene (right). Boxplots show mean±s.d  
358 and whiskers are extreme values.

359

360

361



362

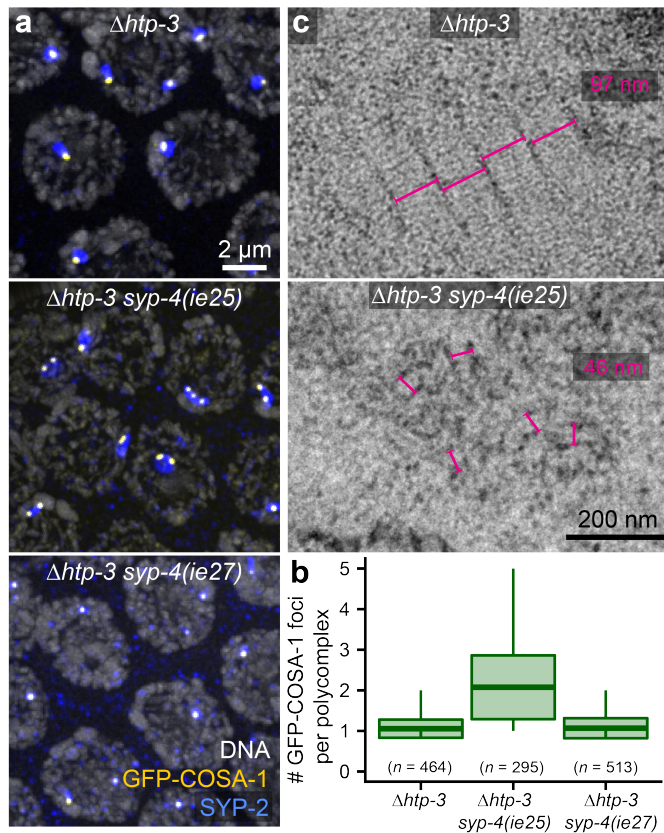

363

364 **Figure 4: Irregular organization and an increase in GFP-COSA-1 foci in *syp-4(ie25)***

365 **polycomplexes.** (a) Fluorescence micrographs show that the number of GFP-COSA-1 foci  
366 (yellow) is limited to 1 or 2 per polycomplex (SYP-2, blue) in wild-type conditions ( $\Delta htp-3$ ) and  
367 in the presence of *syp-4(ie27)* but is elevated in *syp-4(ie25)*. DAPI is shown in gray. (b)

368 Quantification of GFP-COSA-1 foci. Boxplots show mean $\pm$ s.d. and whiskers are extreme values.

369 (c) Representative electron micrographs show that the SC-like structure of polycomplexes ( $\Delta htp-$

370 3, 97 nm spacing of parallel, electron dark regions) is disturbed in  $\Delta htp-3 syp-4(ie25)$ , which are

371 disorganized and 46 nm apart.

372

373

374

375 **Table S1: Summary of localizations of SC components determined by STORM.** Positions  
 376 are distances of the maxima to the center of the SC (wt = wild-type; early = early pachytene;  
 377 mid(-) = mid pachytene nuclei without bright GFP-COSA-1 foci; mid(+) = mid pachytene nuclei  
 378 with bright GFP-COSA-1 foci). HWHM denotes the half width at half maximum of the  
 379 distributions (Fig. 1m, gray lines)

| domain   | condition           | x [nm]     |            | z [nm]   |            | total length analyzed [nm] (# images) |
|----------|---------------------|------------|------------|----------|------------|---------------------------------------|
|          |                     | position   | HWHM       | position | HWHM       |                                       |
| HA-SYP-1 | wt, early           | 0          | 28.3 ± 1.8 | 0        | 33.1 ± 2.7 | 3438 (8)                              |
|          | wt; mid(-)          | 0          | 27.5 ± 1.6 | 0        | 65.4 ± 2.8 | 3056 (5)                              |
|          | wt; mid(+)          | 0          | 29.4 ± 2.6 | 0        | 69.7 ± 3.5 | 3992 (6)                              |
|          | wt, late pachytene  | 0          | 27.0 ± 1.6 | 0        | 29.1 ± 3.7 | 4780 (9)                              |
|          | zhp-3(jf61)         | 0          | 42.7 ± 2.5 | 0        | 46.9 ± 2.9 | 3579 (7)                              |
|          | plk-2(ok1936)       | 0          | 25.5 ± 1.5 | 0        | 52.0 ± 3.9 | 4136 (10)                             |
|          | syp-4(ie25); early  | 0          | 22.1 ± 1.4 | 0        | 28.6 ± 1.2 | 4351 (10)                             |
|          | syp-4(ie25); late   | 0          | 19.8 ± 0.8 | 0        | 20.5 ± 1.6 | 3114 (6)                              |
| SYP-1(C) | wt, early           | 42.3 ± 0.8 | 22.8 ± 0.9 | 0        | 37.1 ± 2.3 | 4092 (7)                              |
|          | wt; mid(-)          | 40.8 ± 1.3 | 28.2 ± 0.6 | 0        | 68.1 ± 4.3 | 3184 (7)                              |
|          | wt; mid(+)          | 35.9 ± 0.9 | 31.2 ± 1.0 | 0        | 78.7 ± 2.8 | 3503 (7)                              |
|          | wt, late pachytene  | 42.0 ± 1.2 | 28.5 ± 1.0 | 0        | 62.7 ± 3.2 | 5312 (9)                              |
|          | zhp-3(jf61); late   | 41.0 ± 1.3 | 23.6 ± 1.1 | 0        | 48.2 ± 4.3 | 1851 (8)                              |
|          | plk-2(ok1936); late | 36.3 ± 1.4 | 39.6 ± 3.6 | 0        | 67.0 ± 2.5 | 5741 (9)                              |
|          | syp-4(ie25);        | 38.5 ± 2.5 | 24.9 ± 0.8 | 0        | 43.2 ± 3.8 | 2768 (5)                              |



|                   |                        |            |            |   |            |           |
|-------------------|------------------------|------------|------------|---|------------|-----------|
|                   | early                  |            |            |   |            |           |
|                   | syp-4(ie25);<br>late   | 30.5 ± 1.5 | 29.1 ± 1.8 | 0 | 54.0 ± 2.2 | 4848 (6)  |
| SYP-2(C)          | wt, early              | 0          | 27.0 ± 2.0 | 0 | 38.3 ± 3.7 | 5866 (10) |
|                   | wt; mid(-)             | 16.3 ± 7.5 | 27.1 ± 2.7 | 0 | 27.6 ± 1.1 | 8437 (9)  |
|                   | wt; mid(+)             | 20.6 ± 6.3 | 26.5 ± 3.6 | 0 | 27.7 ± 1.4 | 8615 (12) |
|                   | wt, late<br>pachytene  | 18.9 ± 2.1 | 21.6 ± 1.5 | 0 | 49.5 ± 5.0 | 4573 (9)  |
|                   | wt, late (HA)          | 20.9 ± 0.9 | 20.0 ± 1.3 | 0 | 39.9 ± 2.6 | 2958 (8)  |
|                   | zhp-3(jf61);<br>late   | 0          | 36.1 ± 4.3 | 0 | 38.6 ± 3.8 | 3746 (6)  |
|                   | plk-2(ok1936);<br>late | 0          | 37.1 ± 2.0 | 0 | 47.4 ± 2.3 | 8206 (9)  |
|                   | syp-4(ie25);<br>early  | 0          | 32.4 ± 2.2 | 0 | 73.6 ± 8.8 | 3172 (7)  |
|                   | syp-4(ie25);<br>late   | 0          | 28.9 ± 2.7 | 0 | 33.4 ± 3.2 | 3604 (8)  |
| GFP-SYP-<br>3     | wt, early              | 0          | 23.3 ± 0.8 | 0 | 40.0 ± 4.5 | 1784 (4)  |
|                   | wt, late<br>pachytene  | 0          | 18.5 ± 1.4 | 0 | 63.2 ± 6.2 | 2238 (6)  |
| SYP-3-HA          | wt, early              | 12.3 ± 1.8 | 20.3 ± 1.2 | 0 | 27.1 ± 2.4 | 4653 (10) |
|                   | wt, late<br>pachytene  | 16.6 ± 4.7 | 29.0 ± 2.3 | 0 | 48.1 ± 5.9 | 2764 (7)  |
|                   | zhp-3(jf61);<br>late   | 14.2 ± 2.0 | 24.4 ± 1.4 | 0 | 28.5 ± 2.2 | 2723 (6)  |
| SYP-4-<br>intFlag | wt, early              | 0          | 25.8 ± 0.9 | 0 | 43.3 ± 5.3 | 3462 (9)  |
|                   | wt, late<br>pachytene  | 0          | 30.3 ± 4.3 | 0 | 49.8 ± 4.6 | 2524 (4)  |
| SYP-4-HA          | wt, early              | 14.2 ± 2.0 | 23.0 ± 1.6 | 0 | 38.6 ± 2.4 | 5355 (10) |

|                      |                             |                |                |                 |                |           |
|----------------------|-----------------------------|----------------|----------------|-----------------|----------------|-----------|
|                      | wt, late pachytene          | 0              | $36.8 \pm 1.1$ | $33.1 \pm 11.9$ | $51.5 \pm 8.0$ | 5264 (9)  |
| SYP-4( <i>ie25</i> ) | <i>syp-4(ie25)</i> ; late   | 0              | $29.1 \pm 1.1$ | 0               | $54.9 \pm 5.6$ | 4611 (9)  |
| HIM-3                | wt, early                   | $33.5 \pm 5.2$ | $43.4 \pm 2.3$ | n.d.            | n.d.           | 2548 (6)  |
|                      | wt, mid(-)                  | $41.4 \pm 2.2$ | $46.7 \pm 1.8$ | n.d.            | n.d.           | 3661 (7)  |
|                      | wt, mid(+)                  | $41.8 \pm 1.9$ | $45.1 \pm 1.2$ | n.d.            | n.d.           | 2817 (7)  |
|                      | wt, late pachytene          | $47.3 \pm 1.5$ | $30.2 \pm 1.2$ | n.d.            | n.d.           | 4411 (11) |
|                      | <i>zhp-3(jf61)</i> ; late   | $45.9 \pm 1.6$ | $49.0 \pm 2.3$ | n.d.            | n.d.           | 6969 (11) |
|                      | <i>plk-2(ok1936)</i> ; late | $41.5 \pm 3.8$ | $53.9 \pm 4.1$ | n.d.            | n.d.           | 4769 (8)  |
|                      | <i>syp-4(ie25)</i> ; early  | $45.3 \pm 3.6$ | $48.9 \pm 2.7$ | n.d.            | n.d.           | 3900 (7)  |
|                      | <i>syp-4(ie25)</i> ; late   | $35.8 \pm 3.8$ | $45.9 \pm 3.1$ | n.d.            | n.d.           | 2926 (6)  |

380

381

382

383

384

385 **Table S2: List of Strains used in this study and their characterization.** *p*-Values for deviation  
 386 from wild-type are calculated using Mann-Whitney tests.  
 387

| name                       | genotype                                                                                                        | egg viability [%] ( <i>p</i> -value) | males [%] ( <i>p</i> -value) | # of eggs |
|----------------------------|-----------------------------------------------------------------------------------------------------------------|--------------------------------------|------------------------------|-----------|
| N2                         | <i>wild-type</i>                                                                                                | 104±6                                | 0.08±0.20                    | 4773      |
| GFP-COSA-1 [36]            | <i>mels8</i> II                                                                                                 | 107±4                                | 0.00±0.00                    | 1362      |
| mEos-HIM-3 [24]            | <i>mels8</i> II; <i>him-3(ie33)</i> IV                                                                          | n.d.                                 | n.d.                         |           |
| mMaple-HIM-3 [24]          | <i>mels8</i> II; <i>him-3(ie34)</i> IV                                                                          | n.d.                                 | n.d.                         |           |
| HA-SYP-1                   | <i>mels8</i> II; <i>him-3(ie33)</i> IV; <i>syp-1(ie40[syp-1(1-47)::HA::syp-1(48-489)])</i> V                    | 100±4 (0.886)                        | 0.00±0.00 (0.452)            | 840       |
| SYP-2-HA                   | <i>mels8</i> II; <i>him-3(ie33)</i> IV; <i>syp-2(ie99[syp-2::HA])</i> V                                         | 101±6 (0.394)                        | 0.00±0.00 (1.00)             | 1405      |
| GFP-SYP-3                  | <i>syp-3(ok758)</i> I; <i>ieSi11 [syp-3p::syp-3::EmGFP::syp-3-3'UTR + unc-119(+)]</i> II; <i>him-3(ie33)</i> IV | 83±10 (0.031)                        | 0.87±0.59 (0.045)            | 1143      |
| SYP-3-HA                   | <i>syp-3(ie42[syp-3::HA])</i> I; <i>mels8</i> II; <i>him-3(ie33)</i> IV                                         | 95±4 (0.041)                         | 1.80±0.60 (0.004)            | 1457      |
| SYP-4-HA( <i>ie29</i> )    | <i>syp-4(ie29[syp-4::HA])</i> I; <i>mels8</i> II; <i>him-3(ie34)</i> IV                                         | 100±2 (0.150)                        | 0.72±0.41 (0.052)            | 1336      |
| SYP-4-HA( <i>ie29</i> )    | <i>syp-4(ie29[syp-4::HA])</i> I; <i>mels8</i> II                                                                | 105±3 (0.686)                        | 0.00±0.00 (1.000)            | 951       |
| SYP-4-intFlag              | <i>syp-4(ie30[syp-4(1-315)::2xFlag::syp-4(319-605)])</i> I; <i>mels8</i> II; <i>him-3(ie33)</i> IV              | 98±3 (0.032)                         | 1.91±0.59 (0.010)            | 1350      |
| SYP-4( <i>ie25</i> )       | <i>syp-4(ie25[syp-4ΔC::3xFlag])</i> I; <i>mels8</i> II                                                          | 38±4 (0.008)                         | 5.97±1.25 (0.010)            | 1024      |
| SYP-4-HA( <i>ie27</i> )    | <i>syp-4(ie29[syp-4::HA::mod3'UTR])</i> I; <i>mels8</i> II                                                      | 80±9 (0.002)                         | 1.58±1.58 (0.010)            | 992       |
| Δ <i>htp-3</i> [3]         | <i>htp-3(tm3655)</i> I; <i>mels8</i> II                                                                         | n.d.                                 | n.d.                         |           |
| Δ <i>htp-3 syp-4(ie25)</i> | <i>htp-3(ie100) syp-4(ie25)</i> I; <i>mels8</i> II                                                              | n.d.                                 | n.d.                         |           |

|                                       |                                                                        |      |      |  |
|---------------------------------------|------------------------------------------------------------------------|------|------|--|
| <b><i>Δhtp-3 syp-4(ie27)</i></b>      | <i>htp-3(ie101) syp-4(ie27) I; mels8 II</i>                            | n.d. | n.d. |  |
| <b>SYP-4(ie25)</b>                    | <i>syp-4(ie25[syp-4ΔC::3xFlag] I; mels8 II; him-3(ie33) IV</i>         | n.d. | n.d. |  |
| <b>SYP-4(ie25); HA-SYP-1</b>          | <i>syp-4(ie25) I; mels8 II; him-3(ie33) IV; syp-1(ie40) V</i>          | n.d. | n.d. |  |
| <b><i>zhp-3(jf61)</i></b>             | <i>zhp-3(jf61) I; mels8 II; him-3(ie33) IV</i>                         | n.d. | n.d. |  |
| <b><i>zhp-3(jf61); HA-SYP-1</i></b>   | <i>zhp-3(jf61) I; mels8 II; him-3(ie33) IV; syp-1(ie40) V</i>          | n.d. | n.d. |  |
| <b><i>zhp-3(jf61) SYP-3-HA</i></b>    | <i>syp-3(ie102[syp-3::HA]) zhp-3(jf61) I; mels8 II; him-3(ie33) IV</i> | n.d. | n.d. |  |
| <b><i>plk-2(ok1936); HA-SYP-1</i></b> | <i>plk-2(ok1936) I; mels8 II; him-3(ie33) IV; syp-1(ie40) V</i>        | n.d. | n.d. |  |

388  
389

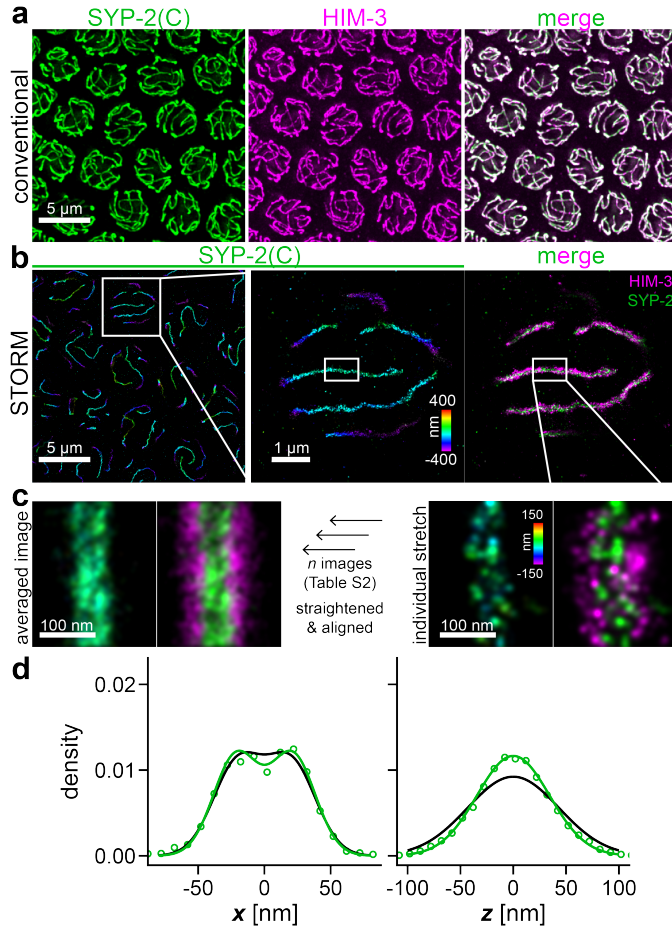

390  
391 **Extended Data Figure S1: Experimental strategy for mapping the architecture of the**  
392 **synaptonemal complex.** (a) The resolution in conventional fluorescence micrographs is  
393 insufficient to visualize the structure of the axis or SC (HIM-3, magenta, left) and SC  
394 components (SYP-2-HA, green, center) are co-localized (merge, right). (b) The structure of the  
395 SC is resolved by STORM super-resolution microscopy. Colors denote localization in  $z$  (left and  
396 center). Localization of HIM-3 (magenta, right) is used to determine the orientation of the SC  
397 (SYP-2-HA(C), wild-type, late pachytene in green). White boxes in b show regions magnified in  
398 other panels. (c) For further analysis, individual stretches in frontal view (right), which are  
399 characterized by clearly separated HIM-3 axes, are straightened and aligned in  $x$  and  $z$  to  
400 generate the averaged image (left). (d) The results are highly reproducible between different  
401 preparations and different antibodies (SYP-2(C) peptide antibody, black, and SYP-2-HA epitope  
402 antibody, green) (Table S2). Note that the widths of the distributions are narrower for the  
403 monoclonal HA antibody compared to the polyclonal SYP-2(C) peptide antibody.

404

405

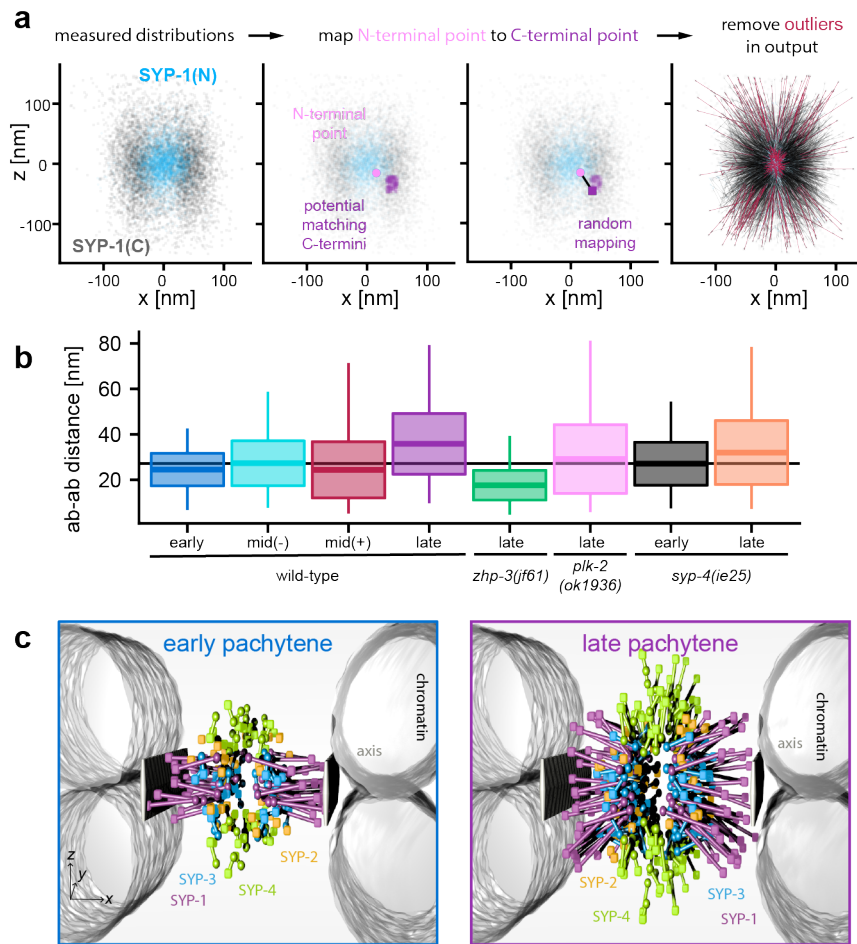

406

407 **Extended Figure S2: Dynamic orientation of SYP-1 molecules.** (a) To generate a model of  
 408 SYP orientation within the SC, individual datapoints (magenta circle, center) in the measured  
 409 distributions of the N- (blue, left) and C-terminus (gray, left) of a given component (here: SYP-1  
 410 in wild-type late pachytene) are randomly mapped to a localization event within the same  
 411 percentile  $\pm 7.5\%$  tolerance of the C-terminal distribution in  $x$  and  $z$  (purple, center). Mapped  
 412 events resulting in the shortest or longest 5% of antibody to antibody distances (red, right) are  
 413 disregarded. (b) The boxplots show means  $\pm$  s.d. of the distances between N- and C-terminal  
 414 antibodies as estimated by the probabilistic mapping approach. Whiskers are extremes and the  
 415 black line shows the mean across all genotypes and conditions. (c) The resultant model of SC  
 416 organization generated by mapping of N- and C-terminal distributions of SYP proteins is shown  
 417 for early (left) and late (right) pachytene in wild-type animals. C-termini are cubes and N-termini

418 (central domain for SYP-4) are spheres. The localization of HIM-3 in  $x$  is used as a proxy for  
419 axis localization. Models are rendered using POV-ray (v3.7.0).

420

421



422

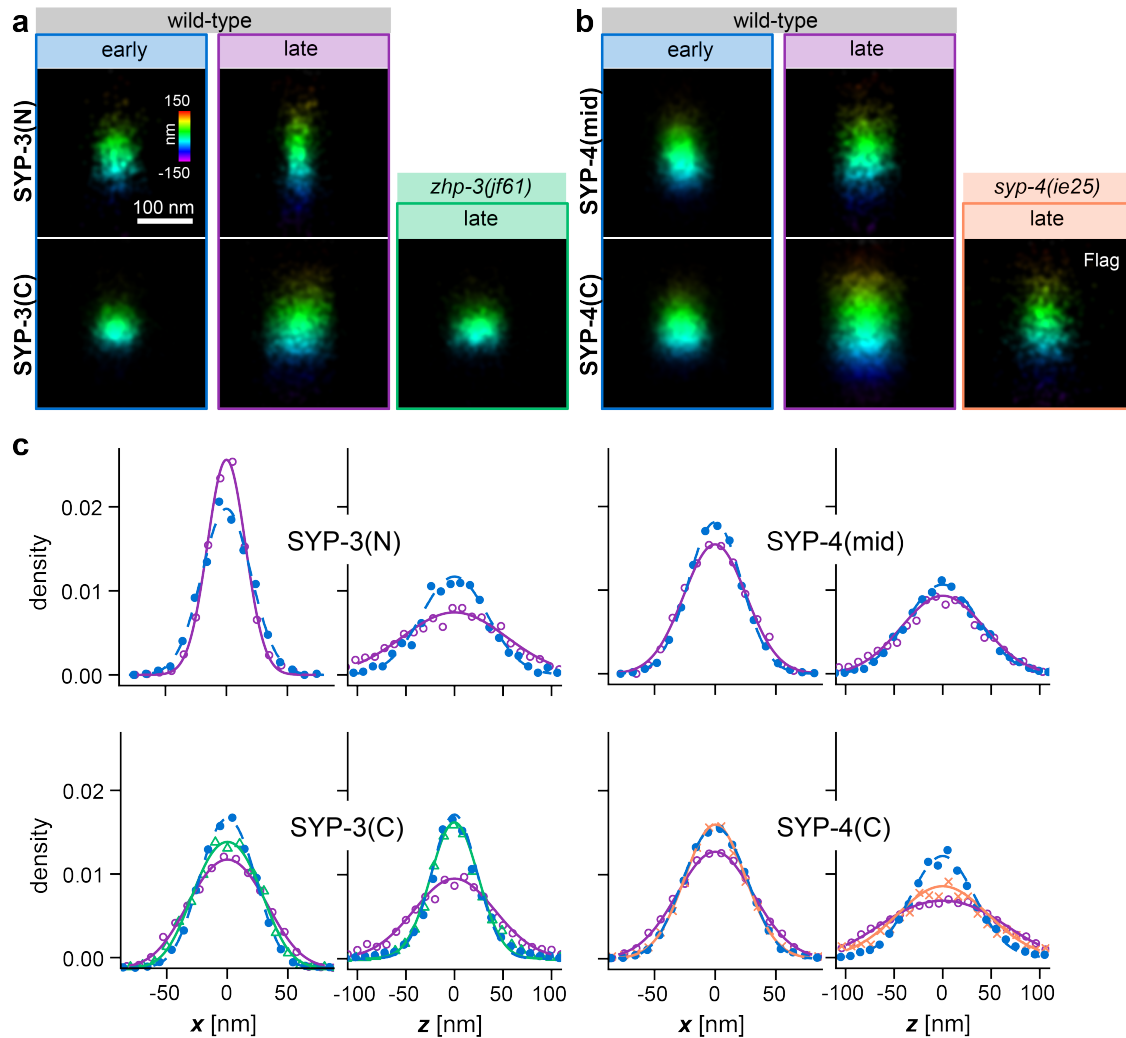

423

424 **Extended Data Figure S3: Dynamic organization of SYP-3 and SYP-4 within the SC. (a-b)**

425 Averaged STORM images show cross-sectional views of SYP-3 (a) and SYP-4 (b) domains as

426 indicated in wild type at early (blue) and late pachytene (purple) and *zhp-3(jf61)* (orange) and

427 *syp-4(ie25)* (green) mutants in late pachytene. Colors denote localization in *z*. The distributions

428 of localization events in frontal (*x*), and vertical (*z*) views are analyzed in (c). The results are

429 summarized in Extended Data Table S2.

430

431

432

433

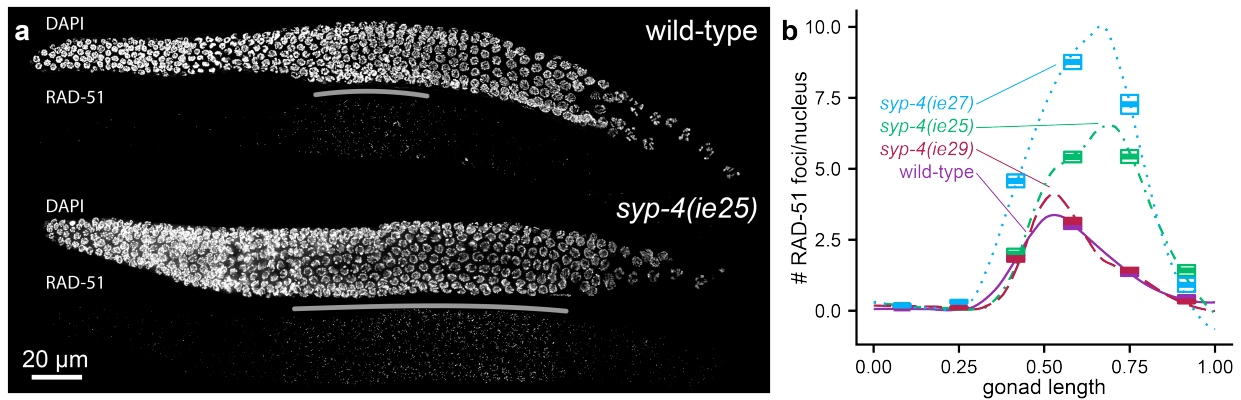

434

435 **Extended Data Figure S4: Double-strand break formation is extended in *syp-4(ie25)*.** (a)

436 Immunofluorescence images show DAPI (upper) and RAD-51 (lower), which marks double-

437 strand breaks. While the RAD-51 zone (gray line) is normally limited to a short region in

438 early/mid-pachytene in wild-type (top), it is markedly elongated in *syp-4(ie25)* (bottom). (b)

439 shows the average number of RAD-51 foci per nucleus (boxes are mean±s.e.) as a function of the

440 relative length of the gonad from the distal tip to the end of pachynema of wild-type (purple solid

441 line,  $n=1672$  nuclei from (7) gonads), *syp-4(ie29)* (red dashed line,  $n=1407$  (6)), *syp-4(ie25)*

442 (green dot-dashed line,  $n=1440$  (6)) and *syp-4(ie27)* (blue dotted line,  $n=1162$  (4)), respectively.

443

444

445

446

447

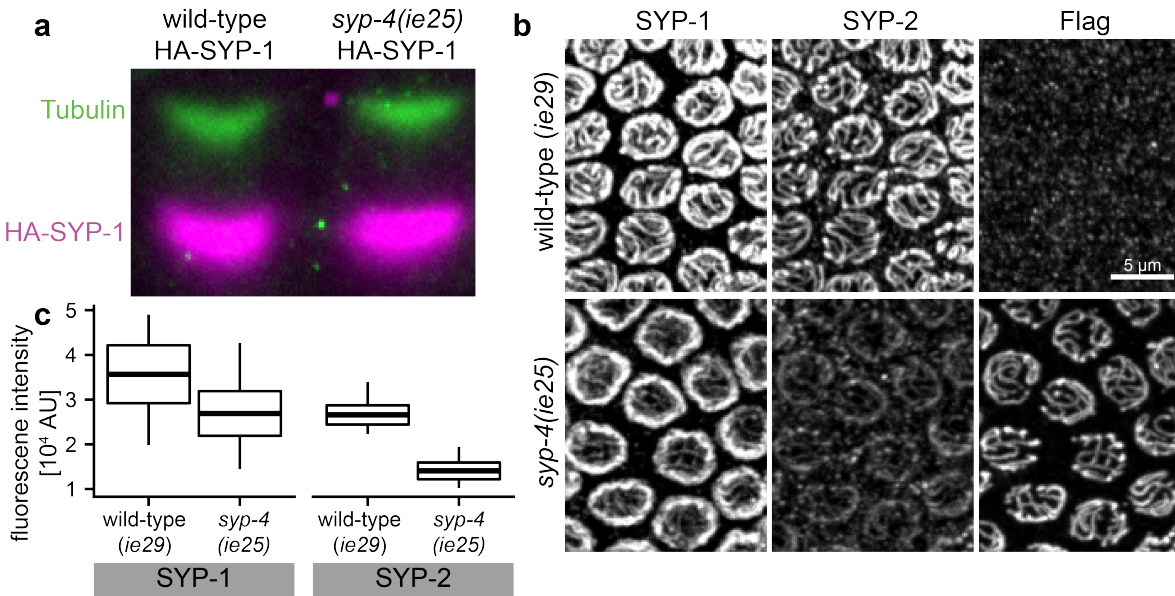

448

449 **Extended Data Figure S5: Abundance of SC proteins in *syp-4(ie25)*.** (a) The expression level  
450 of HA-SYP-1 (magenta) is identical in wild-type and *syp-4(ie25)* strains as shown by a Western  
451 Blot. Tubulin (green) is shown as a reference. (b) By contrast, the levels of immunofluorescence  
452 staining for SYP-1 (left) and SYP-2 (center) are drastically reduced in *syp-4(ie25)* SCs (bottom)  
453 compared to wild-type (*syp-4-ha(ie29)*, right). To ensure identical handling, gonads from both  
454 genotypes were stained in a single reaction and their genotype was determined by anti-Flag  
455 staining (right), which marks *syp-4(ie25)* but not *syp-4(ie29)*. (c) Boxplots show mean $\pm$ s.d.  
456 (whiskers are extreme values) of fluorescence intensities of late pachytene SCs (*ie29*:  $n=339$ ,  
457 *ie25*:  $n=209$ ).

458

459

460

461

462

**a** *syp-4-ha(ie29)* CCTCGTTCCTTAACTTTTACCCCTACGATGTCCAGATTATGCTTAGaaaattatcatgta  
*syp-4-ha(ie27)* CCTCGTTCCTTAACTTTTACCCCTACGATGTCCAGATTATGCTTAGaaaattatcatgta  
HA-tag Stop  
*syp-4-ha(ie29)* ttatttcagctcttgtatcatttgtatc-----  
*syp-4-ha(ie27)* ttatttcagctcttgtatcatttgtatc**ataaatctgagggcggaacagcaccctcgttcttt**  
3'UTR insertion  
*syp-4-ha(ie29)* -----gtttaatgtca  
*syp-4-ha(ie27)* **aacttttagaaaattatcatgtattatttcagctcttgtatcatttgtatc**gtttaatgtca

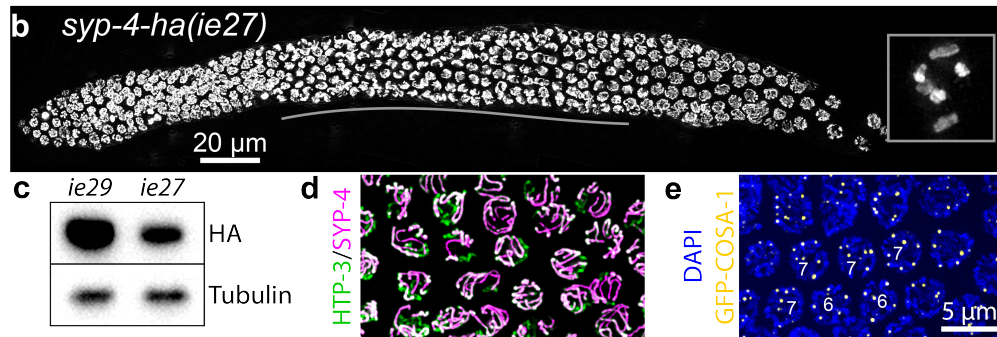

463

464

**Extended Data Figure S6: The *syp-4-ha(ie27)* mutation phenocopies partial RNAi of other**

465

**SC components.** (a) The mutation *syp-4-ha(ie27)* (bottom) is constituted by an insertion (cyan)

466

in the 3' untranslated region (lower case letters) of the *syp-4* gene, but the coding sequence

467

(capital letters) is identical to *syp-4-ha(ie29)* (top), which is phenotypically wild-type. (b) A

468

DAPI stained fluorescence micrographs show that meiotic progression is delayed in *syp-4-*

469

*ha(ie27)* as indicated by an elongated transition zone (gray line) but can form 6 bivalents (inset)

470

indicating largely successful homologous pairing and crossover formation. (c) A western blot

471

shows that the level of SYP-4-HA (top) is reduced to ~ 30 % in *syp-4-ha(ie27)* compared to *syp-*

472

*4-ha(ie29)*. Tubulin is shown as a reference (bottom). (d) Synapsis is delayed in *syp-4-ha(ie27)*

473

as shown by the incomplete overlap of immunofluorescence images of an axial protein (HTP-3,

474

green) and SC proteins (SYP-4-HA, magenta). (e) As has been described for partial RNAi

475

depletion of SYP-1, -2 and -3[9], a reduction in SYP-4 expression level results in a slight

476

increase in the number of GFP-COSA-1 (yellow) foci to about 7 foci/nucleus (DAPI is shown in

477

blue).

478

479

## 480 Methods

### 481 Worm strains and transgenes

482 A complete list of *C. elegans* strains used in this study can be found in Table S1. All strains were  
483 cultured at 20°C using standard methods[52]. GFP-SYP-3[32] was inserted by MosSCI[53] and  
484 crossed into *syp-3(ok758)*. Other tags were inserted using CRISPR-Cas9 genome editing as  
485 described in[24]. Briefly, Cas9 and gRNA were delivered by microinjection, either encoded on a  
486 plasmid[54] or as *in vitro* preassembled Cas9-ribonucleoprotein complexes. Repair templates for  
487 small epitope tags were codon optimized for *C. elegans* [55] and synthesized as “Ultramers” by  
488 IDT.

489

### 490 Immunofluorescence

491 Immunofluorescence of dissected gonads from young adults 24 h post L4 was performed as  
492 described[56] with modifications described in[24]. The following primary antibodies, all of  
493 which have been previously described, were used: goat anti-SYP-1 (1:500, affinity purified)[37],  
494 mouse anti-HA (1:500, monoclonal 2-2.2.14, Thermo Fisher Scientific), rabbit anti-SYP-2  
495 (1:500, affinity purified)[16], mouse anti-GFP (1:500, monoclonal 7.1 and 13.1, Roche), mouse  
496 anti-Flag (1:500, monoclonal M2, Sigma-Aldrich), chicken anti-HTP-3 (1:500)[57], rabbit anti-  
497 HIM-3 (1:500, SDQ4713 ModENCODE project)[58], rabbit anti-HIM-8pT64 (1:2000)[41], and  
498 rabbit anti-RAD-51 (1:500)[37]. Secondary antibodies raised in donkeys were fluorescently  
499 labelled with Alexa Fluor® 488, Cy3 or Alexa Fluor® 647 (1:500, Jackson ImmunoResearch  
500 and Invitrogen). Gonads were mounted in ProLong Gold antifade mountant (ThermoFisher  
501 Scientific) and epifluorescence images were acquired on a DeltaVision Elite microscope  
502 (Applied Precision) using a 100× N.A. 1.4 oil-immersion objective.

503 For quantification of proteins levels by immunofluorescence, imaging was performed on a  
504 Marianas spinning-disk confocal microscope (3i) with a 100x 1.46 NA oil immersion objective.  
505 3D stacks of wild-type (*syp-4-ha(ie29)*) and *syp-4(ie25)* animals were taken from the same slide  
506 and quantified in Fiji. SC containing voxels are identified by thresholding the SYP-2 and SYP-4-  
507 3xFlag channels for *syp-4(ie29)* and *syp-4(ie25)*, respectively. Images shown in Fig. S6 are  
508 background subtracted maximal intensity projections with equally scaled intensity values.

509

### 510 STORM and PALM imaging

30

511 Super-resolution imaging of dissected, immuno-stained intact germline tissue was carried out as  
512 described[24]. Targets for STORM were labeled with donkey or goat secondary antibodies  
513 labelled with Alexa Fluor® 647 (1:500, Jackson ImmunoResearch and Invitrogen).  
514 Subsequently, the fluorescently tagged internal reference protein, mEos2-HIM-3 or mMaple3-  
515 HIM-3[24] was imaged using PALM [59] [60]. For early pachytene images, mEos2-HIM-3 was  
516 co-stained with a rabbit anti-HIM-3 antibody and a donkey-anti-rabbit secondary antibody  
517 (Jackson ImmunoResearch) labelled with NHS esters of CF568 to achieve a 2:1 dye-to-antibody  
518 ratio. Aligned and averaged images (Fig. S1) were used to generate histograms of localization  
519 events in  $x$  and  $z$ [24]. To systematically distinguish between mono- and bi-modal distributions,  
520 we evaluated fits with one and two Gaussians using an ANOVA test in R ( $p < 0.05$ ). Standard  
521 deviations of fit parameters were estimated by a subsampling approach using subsets of half the  
522 number of individual SC stretches[24]. The results are summarized in Table S2.

523

## 524 **Statistical analysis**

525 Sample sizes were not predetermined, and experiments were not randomized. The investigators  
526 were not blinded to allocation during experiments and outcome assessment. For STORM  
527 experiments, the total lengths and number of stretches analyzed are summarized in Table S2.

528

## 529 **Analysis of of SC organization**

530 To derive a model for SC organization from our data, we asked which orientations of SC  
531 proteins were consistent with the observed distributions, assuming that each protein is a rigid  
532 rod. We first corrected the raw data by removing the extreme 2.5% of the localization events  
533 using squared Mahalanobis distances in R (version 3.4.2). We then mapped each localization  
534 event corresponding the  $n$ th-percentile in  $x$  and the  $m$ th-percentile in  $z$  of the N- (or C-) terminal  
535 distribution to a randomly selected localization event within the  $n$ th  $\pm$  7.5% in  $x$  and  $m$ th  $\pm$  7.5%  
536 in  $z$  of the corresponding C- (or N-) terminal distribution. This analysis reveals the distance  
537 between the N- and C-terminal antibodies used for imaging and the orientation of the protein  
538 within the SC. For further analysis, we remove outliers among the mapped localization events  
539 with extreme values corresponding to the lower and upper 2.5% of distances.

540 To visualize changes within SC organization, we performed principal component analysis of the  
541 widths, and – where applicable – positions off-center, for N- and C-terminal distributions of



542 SYP-1 and the C-terminal distribution of SYP-2, the orientations of SYP-1 molecules as  
543 characterized by the median and 90th percentile angles, and the average distance between N- and  
544 C-terminal antibodies using R (version 3.4.2). We excluded SYP-3 and SYP-4 from this analysis  
545 since experimental challenges prevented us from analyzing their localizations for all genotypes.  
546

### 547 **Recombination mapping**

548 To map meiotic recombination events, the *syp-4(ie25)* allele (generated in Bristol N2  
549 background) was introgressed into the divergent Hawaiian strain CB4856 by 8 sequential crosses  
550 and selection for *ie25*. Hawaiian and Bristol wild-type and *syp-4(ie25)* strains were crossed, and  
551 the hybrid F1 progeny were backcrossed to Hawaiian males. These cross-progeny, which have  
552 Hawaiian paternal chromosomes and recombined Bristol/Hawaiian maternal chromosomes, were  
553 plated individually, allowed to reproduce for one generation, and the genomic DNA of their  
554 pooled progeny was extracted by phenol-chloroform extraction. Illumina sequencing libraries  
555 were prepared as described in [61] and sequenced as 50 bp single reads on a HiSeq2500 Illumina  
556 sequencer at the Vincent J. Coates Genomics Sequencing Laboratory at UC Berkeley, with a  
557 coverage of 2-4x per individual. Reads were mapped to the genomes of Bristol (Wormbase  
558 release WS230) and Hawaiian[62] strains and genotypes called using the multiplexed shotgun  
559 genotyping (MSG) toolbox and default parameters[63]. Aligned sequences obtained by deep  
560 sequencing have been uploaded on the NCBI SRA database under accession number  
561 SRP126693. Following this analysis, crossovers in oogenesis are characterized by transitions  
562 from Hawaiian/Bristol heterozygous stretches to homozygous Hawaiian stretches, and the  
563 calculated number of crossovers per nucleus is twice the number of mapped crossovers in the  
564 oocytes.  
565

### 566 **Electron microscopy**

567 High-pressure freezing, freeze-substitution, sample preparation, and microscopy was performed  
568 as described previously[3, 64, 65]. Images were acquired on a Tecnai 12 transmission electron  
569 microscope (120 kV, FEI, Hillsboro, OR) equipped with a Gatan Ultrascan 1000 CCD camera  
570 (Pleasanton, CA).  
571



572 **Immunoblotting**

573 To compare expression levels of SYP proteins, 120 adult worms were lysed by boiling in 40  $\mu$ L  
574 Laemmli sample buffer (with  $\beta$ -mercaptoethanol) for about 5 min, until particulate matter was  
575 not detected using a dissection stereomicroscope. Samples of whole-worm lysates were run on a  
576 NuPage 4-12% polyacrylamide gradient gel and transferred to a PVDF membrane. Primary  
577 antibodies were rabbit (Pierce, PA1-985, used for HA-SYP-1) or mouse anti-HA (SYP-4-HA)  
578 and mouse anti-tubulin (EMD Millipore), each diluted 1:5,000. HRP-conjugated secondary  
579 antibodies (Jackson Laboratory) were detected with ECL reagents (Amersham). For SYP-4-HA  
580 blots, HA and tubulin were easily resolved and can be detected simultaneously. For HA-SYP-1,  
581 HA was detected by HRP-anti-rabbit/ECL and tubulin is detected by Cy3-conjugated anti-mouse  
582 secondary antibody (1:5,000). Images were recorded using a Chemidoc system (Bio-Rad) and  
583 quantified using Fiji.

584

585 **Data Availability**

586 NGS datasets generated during the current study are available on the NCBI SRA database under  
587 accession number SRP126693 (<https://www.ncbi.nlm.nih.gov/sra/SRP126693>). Any additional  
588 data are available upon reasonable request.

589

590

591

## 592 **Acknowledgements**

593 We thank Lydia Smith and Rasmus Nielsen for assistance with recombination mapping, Kent  
594 McDonald and Reena Zalpuri for help with high-pressure freezing and electron microscopy and  
595 Ofer Rog and current members of our laboratories for helpful discussions and critical reading of  
596 the manuscript. Some nematode strains used in this work were provided by the Caenorhabditis  
597 Genetics Center, which is supported by the NIH - Office of Research Infrastructure Programs  
598 (P40 OD010440). This work was funded by a postdoctoral fellowship of the Human Frontier  
599 Science Program to SK (LT000903/2013-C), an NSF Graduate Research Fellowship (DGE  
600 1106400) to MW, the Pew Biomedical Scholars Award and the Chan Zuckerberg Biohub to KX,  
601 and support to AFD from the National Institutes of Health (R01 GM065591) and the Howard  
602 Hughes Medical Institute.

603

## 604 **Competing Interests**

605 The authors declare no competing interests.

606

607

## 608 **Author Contributions**

609 SK and MW performed experiments and analyzed data. SK, MW, KX and AFD designed  
610 experiments and wrote the manuscript.

611

612

## 613 **References**

614

- 615 1. Zickler D, Kleckner N (1999) Meiotic chromosomes: integrating structure and function.  
616 *Annu Rev Genet* 33:603–754. doi: 10.1146/annurev.genet.33.1.603
- 617 2. Moses MJ (1968) Synaptonemal complex. *Annu Rev Genet* 2:363–412.
- 618 3. Rog O, Köhler S, Dernburg AF (2017) The synaptonemal complex has liquid crystalline  
619 properties and spatially regulates meiotic recombination factors. *Elife* 6:e21455. doi:  
620 10.7554/eLife.21455

- 621 4. Voelkel-Meiman K, Moustafa SS, Lefrançois P, et al (2012) Full-length synaptonemal  
622 complex grows continuously during meiotic prophase in budding yeast. *PLoS Genet*  
623 8:e1002993. doi: 10.1371/journal.pgen.1002993
- 624 5. Pattabiraman D, Roelens B, Woglar A, Villeneuve AM (2017) Meiotic recombination  
625 modulates the structure and dynamics of the synaptonemal complex during *C. elegans*  
626 meiosis. *PLoS Genet* 13:e1006670. doi: 10.1371/journal.pgen.1006670
- 627 6. Machovina TS, Mainpal R, Daryabeigi A, et al (2016) A Surveillance System Ensures  
628 Crossover Formation in *C. elegans*. *Curr Biol* 26:2873–2884. doi: 10.1016/j.cub.2016.09.007
- 629 7. Nadarajan S, Lambert TJ, Altendorfer E, et al (2017) Polo-like kinase-dependent  
630 phosphorylation of the synaptonemal complex protein SYP-4 regulates double-strand break  
631 formation through a negative feedback loop. *Elife* 6:e23437. doi: 10.7554/eLife.23437
- 632 8. Hayashi M, Mlynarczyk-Evans S, Villeneuve AM (2010) The synaptonemal complex shapes  
633 the crossover landscape through cooperative assembly, crossover promotion and crossover  
634 inhibition during *Caenorhabditis elegans* meiosis. *Genetics* 186:45–58. doi:  
635 10.1534/genetics.110.115501
- 636 9. Libuda DE, Uzawa S, Meyer BJ, Villeneuve AM (2013) Meiotic chromosome structures  
637 constrain and respond to designation of crossover sites. *Nature* 502:703–706. doi:  
638 10.1038/nature12577
- 639 10. Wang K, Wang C, Liu Q, et al (2015) Increasing the Genetic Recombination Frequency by  
640 Partial Loss of Function of the Synaptonemal Complex in Rice. *Mol Plant* 8:1295–1298. doi:  
641 10.1016/j.molp.2015.04.011
- 642 11. Woglar A, Villeneuve AM (2018) Dynamic Architecture of DNA Repair Complexes and the  
643 Synaptonemal Complex at Sites of Meiotic Recombination. *Cell* 173:1678–1691.e16. doi:  
644 10.1016/j.cell.2018.03.066
- 645 12. Cahoon CK, Helm JM, Libuda DE (2019) Synaptonemal complex proteins direct and  
646 constrain the localization of crossover-promoting proteins during *Caenorhabditis elegans*  
647 meiosis. *bioRxiv* 523605. doi: 10.1101/523605
- 648 13. Zhang L, Köhler S, Rillo-Bohn R, Dernburg AF (2018) A compartmentalized signaling  
649 network mediates crossover control in meiosis. *Elife* 7:245. doi: 10.7554/eLife.30789

- 650 14. Dernburg AF, McDonald K, Moulder G, et al (1998) Meiotic recombination in *C. elegans*  
651 initiates by a conserved mechanism and is dispensable for homologous chromosome  
652 synapsis. *Cell* 94:387–398.
- 653 15. MacQueen AJ, Colaiácovo MP, McDonald K, Villeneuve AM (2002) Synapsis-dependent  
654 and -independent mechanisms stabilize homolog pairing during meiotic prophase in *C.*  
655 *elegans*. *Genes Dev* 16:2428–2442. doi: 10.1101/gad.1011602
- 656 16. Colaiácovo MP, MacQueen AJ, Martinez-Perez E, et al (2003) Synaptonemal complex  
657 assembly in *C. elegans* is dispensable for loading strand-exchange proteins but critical for  
658 proper completion of recombination. *Dev Cell* 5:463–474. doi: 10.1016/S1534-  
659 5807(03)00232-6
- 660 17. Smolikov S, Eizinger A, Schild-Prüfert K, et al (2007) SYP-3 restricts synaptonemal  
661 complex assembly to bridge paired chromosome axes during meiosis in *Caenorhabditis*  
662 *elegans*. *Genetics* 176:2015–2025. doi: 10.1534/genetics.107.072413
- 663 18. Smolikov S, Schild-Prüfert K, Colaiácovo MP (2009) A yeast two-hybrid screen for SYP-3  
664 interactors identifies SYP-4, a component required for synaptonemal complex assembly and  
665 chiasma formation in *Caenorhabditis elegans* meiosis. *PLoS Genet* 5:e1000669. doi:  
666 10.1371/journal.pgen.1000669
- 667 19. Schild-Prüfert K, Saito TT, Smolikov S, et al (2011) Organization of the synaptonemal  
668 complex during meiosis in *Caenorhabditis elegans*. *Genetics* 189:411–421. doi:  
669 10.1534/genetics.111.132431
- 670 20. Schücker K, Holm T, Franke C, et al (2015) Elucidation of synaptonemal complex  
671 organization by super-resolution imaging with isotropic resolution. *Proc Natl Acad Sci*  
672 112:2029–2033. doi: 10.1073/pnas.1414814112
- 673 21. Cahoon CK, Yu Z, Wang Y, et al (2017) Superresolution expansion microscopy reveals the  
674 three-dimensional organization of the *Drosophila* synaptonemal complex. *Proc Natl Acad Sci*  
675 114:E6857–E6866. doi: 10.1073/pnas.1705623114
- 676 22. Rust MJ, Bates M, Zhuang X (2006) Sub-diffraction-limit imaging by stochastic optical  
677 reconstruction microscopy (STORM). *Nat Meth* 3:793–795. doi: 10.1038/nmeth929
- 678 23. Huang B, Wang W, Bates M, Zhuang X (2008) Three-dimensional super-resolution imaging  
679 by stochastic optical reconstruction microscopy. *Science* 319:810–813. doi:  
680 10.1126/science.1153529

- 681 24. Köhler S, Wojcik M, Xu K, Dernburg AF (2017) Superresolution microscopy reveals the  
682 three-dimensional organization of meiotic chromosome axes in intact *Caenorhabditis elegans*  
683 tissue. *Proc Natl Acad Sci* 114:E4734–E4743. doi: 10.1073/pnas.1702312114
- 684 25. Zetka MC, Kawasaki I, Strome S, Müller F (1999) Synapsis and chiasma formation in  
685 *Caenorhabditis elegans* require HIM-3, a meiotic chromosome core component that functions  
686 in chromosome segregation. *Genes Dev* 13:2258–2270.
- 687 26. Gao J, Barroso C, Zhang P, et al (2016) N-terminal acetylation promotes synaptonemal  
688 complex assembly in *C. elegans*. *Genes Dev* 30:2404–2416. doi: 10.1101/gad.277350.116
- 689 27. Schmekel K, Meuwissen RL, Dietrich AJ, et al (1996) Organization of SCP1 protein  
690 molecules within synaptonemal complexes of the rat. *Exp Cell Res* 226:20–30. doi:  
691 10.1006/excr.1996.0198
- 692 28. Sym M, Roeder GS (1995) Zip1-induced changes in synaptonemal complex structure and  
693 polycomplex assembly. *J Cell Biol* 128:455–466.
- 694 29. Higgins JD, Sanchez-Moran E, Armstrong SJ, et al (2005) The Arabidopsis synaptonemal  
695 complex protein ZYP1 is required for chromosome synapsis and normal fidelity of crossing  
696 over. *Genes Dev* 19:2488–2500. doi: 10.1101/gad.354705
- 697 30. Meuwissen RL, Offenbergh HH, Dietrich AJ, et al (1992) A coiled-coil related protein  
698 specific for synapsed regions of meiotic prophase chromosomes. *EMBO J* 11:5091–5100.
- 699 31. Anderson LK, Royer SM, Page SL, et al (2005) Juxtaposition of C(2)M and the transverse  
700 filament protein C(3)G within the central region of *Drosophila* synaptonemal complex. *Proc*  
701 *Natl Acad Sci USA* 102:4482–4487. doi: 10.1073/pnas.0500172102
- 702 32. Rog O, Dernburg AF (2015) Direct Visualization Reveals Kinetics of Meiotic Chromosome  
703 Synapsis. *Cell Rep* 10:1639–1645. doi: 10.1016/j.celrep.2015.02.032
- 704 33. Reynolds A, Qiao H, Yang Y, et al (2013) RNF212 is a dosage-sensitive regulator of  
705 crossing-over during mammalian meiosis. *Nat Genet* 45:269–278. doi: 10.1038/ng.2541
- 706 34. Qiao H, Prasada Rao HBD, Yang Y, et al (2014) Antagonistic roles of ubiquitin ligase HEI10  
707 and SUMO ligase RNF212 regulate meiotic recombination. *Nat Genet* 46:194–199. doi:  
708 10.1038/ng.2858
- 709 35. de Gennes PG, Prost J (1993) *The Physics of Liquid Crystals*, 2nd ed. Clarendon Press,  
710 Oxford

- 711 36. Yokoo R, Zawadzki KA, Nabeshima K, et al (2012) COSA-1 reveals robust homeostasis and  
712 separable licensing and reinforcement steps governing meiotic crossovers. *Cell* 149:75–87.  
713 doi: 10.1016/j.cell.2012.01.052
- 714 37. Harper NC, Rillo R, Jover-Gil S, et al (2011) Pairing centers recruit a Polo-like kinase to  
715 orchestrate meiotic chromosome dynamics in *C. elegans*. *Dev Cell* 21:934–947. doi:  
716 10.1016/j.devcel.2011.09.001
- 717 38. Sato-Carlton A, Nakamura-Tabuchi C, Chartrand SK, et al (2018) Phosphorylation of the  
718 synaptonemal complex protein SYP-1 promotes meiotic chromosome segregation. *The*  
719 *Journal of Cell Biology* 217:555–570. doi: 10.1083/jcb.201707161
- 720 39. Jantsch V, Pasierbek P, Mueller MM, et al (2004) Targeted gene knockout reveals a role in  
721 meiotic recombination for ZHP-3, a Zip3-related protein in *Caenorhabditis elegans*. *Mol Cell*  
722 *Biol* 24:7998–8006. doi: 10.1128/MCB.24.18.7998-8006.2004
- 723 40. Labella S, Woglar A, Jantsch V, Zetka M (2011) Polo kinases establish links between  
724 meiotic chromosomes and cytoskeletal forces essential for homolog pairing. *Dev Cell*  
725 21:948–958. doi: 10.1016/j.devcel.2011.07.011
- 726 41. Kim Y, Kostow N, Demburg AF (2015) The Chromosome Axis Mediates Feedback Control  
727 of CHK-2 to Ensure Crossover Formation in *C. elegans*. *Dev Cell* 35:247–261. doi:  
728 10.1016/j.devcel.2015.09.021
- 729 42. Hillers KJ, Villeneuve AM (2003) Chromosome-wide control of meiotic crossing over in *C.*  
730 *elegans*. *Curr Biol* 13:1641–1647. doi: 10.1038/nrg1210
- 731 43. Nabeshima K, Villeneuve AM, Colaiácovo MP (2005) Crossing over is coupled to late  
732 meiotic prophase bivalent differentiation through asymmetric disassembly of the SC. *J Cell*  
733 *Biol* 168:683–689. doi: 10.1083/jcb.200410144
- 734 44. Broman KW, Weber JL (2000) Characterization of human crossover interference. *Am J Hum*  
735 *Genet* 66:1911–1926. doi: 10.1086/302923
- 736 45. Muller HJ (1916) The mechanism of crossing-over IV. *American Naturalist* 50:421–434.
- 737 46. Drouaud J, Mercier R, Chelysheva L, et al (2007) Sex-specific crossover distributions and  
738 variations in interference level along *Arabidopsis thaliana* chromosome 4. *PLoS Genet*  
739 3:e106. doi: 10.1371/journal.pgen.0030106

- 740 47. Petkov PM, Broman KW, Szatkiewicz JP, Paigen K (2007) Crossover interference underlies  
741 sex differences in recombination rates. *Trends Genet* 23:539–542. doi:  
742 10.1016/j.tig.2007.08.015
- 743 48. Mets DG, Meyer BJ (2009) Condensins Regulate Meiotic DNA Break Distribution, thus  
744 Crossover Frequency, by Controlling Chromosome Structure. *Cell* 139:73–86. doi:  
745 10.1016/j.cell.2009.07.035
- 746 49. Zhang L, Liang Z, Hutchinson J, Kleckner N (2014) Crossover Patterning by the Beam-Film  
747 Model: Analysis and Implications. *PLoS Genet* 10:e1004042. doi:  
748 10.1371/journal.pgen.1004042
- 749 50. Goodyer W, Kaitna S, Couteau F, et al (2008) HTP-3 links DSB formation with homolog  
750 pairing and crossing over during *C. elegans* meiosis. *Dev Cell* 14:263–274. doi:  
751 10.1016/j.devcel.2007.11.016
- 752 51. Kleckner N, Zickler D, Jones GH, et al (2004) A mechanical basis for chromosome function.  
753 *Proc Natl Acad Sci USA* 101:12592–12597. doi: 10.1073/pnas.0402724101
- 754 52. Brenner S (1974) The genetics of *Caenorhabditis elegans*. *Genetics* 77:71–94.
- 755 53. Frøkjær-Jensen C, Davis MW, Hopkins CE, et al (2008) Single-copy insertion of transgenes  
756 in *Caenorhabditis elegans*. *Nat Genet* 40:1375–1383. doi: 10.1038/ng.248
- 757 54. Dickinson DJ, Ward JD, Reiner DJ, Goldstein B (2013) Engineering the *Caenorhabditis*  
758 *elegans* genome using Cas9-triggered homologous recombination. *Nat Meth* 10:1028–1034.  
759 doi: 10.1038/nmeth.2641
- 760 55. Redemann S, Schloissnig S, Ernst S, et al (2011) Codon adaptation-based control of protein  
761 expression in *C. elegans*. *Nat Meth* 8:250–252. doi: 10.1038/nmeth.1565
- 762 56. Phillips CM, McDonald KL, Dernburg AF (2009) Cytological analysis of meiosis in  
763 *Caenorhabditis elegans*. *Methods Mol Biol* 558:171–195. doi: 10.1007/978-1-60761-103-  
764 5\_11
- 765 57. Macqueen AJ, Phillips CM, Bhalla N, et al (2005) Chromosome sites play dual roles to  
766 establish homologous synapsis during meiosis in *C.-elegans*. *Cell* 123:1037–1050. doi:  
767 10.1016/j.cell.2005.09.034
- 768 58. Gerstein MB, Lu ZJ, Van Nostrand EL, et al (2010) Integrative analysis of the  
769 *Caenorhabditis elegans* genome by the modENCODE project. *Science* 330:1775–1787. doi:  
770 10.1126/science.1196914



- 771 59. McKinney SA, Murphy CS, Hazelwood KL, et al (2009) A bright and photostable  
772 photoconvertible fluorescent protein for fusion tags. *Nat Meth* 6:131–133. doi:  
773 10.1038/nmeth.1296
- 774 60. Wang S, Moffitt JR, Dempsey GT, et al (2014) Characterization and development of  
775 photoactivatable fluorescent proteins for single-molecule-based superresolution imaging.  
776 *Proc Natl Acad Sci* 111:8452–8457. doi: 10.1073/pnas.1406593111
- 777 61. Meyer M, Kircher M (2010) Illumina sequencing library preparation for highly multiplexed  
778 target capture and sequencing. *Cold Spring Harb Protoc* 2010:pdb.prot5448. doi:  
779 10.1101/pdb.prot5448
- 780 62. Thompson OA, Snoek LB, Nijveen H, et al (2015) Remarkably Divergent Regions Punctuate  
781 the Genome Assembly of the *Caenorhabditis elegans* Hawaiian Strain CB4856. *Genetics*  
782 200:975–989. doi: 10.1534/genetics.115.175950
- 783 63. Andolfatto P, Davison D, Erezyilmaz D, et al (2011) Multiplexed shotgun genotyping for  
784 rapid and efficient genetic mapping. *Genome Res* 21:610–617. doi: 10.1101/gr.115402.110
- 785 64. McDonald KL, Webb RI (2011) Freeze substitution in 3 hours or less. *J Microsc* 243:227–  
786 233. doi: 10.1111/j.1365-2818.2011.03526.x
- 787 65. McDonald KL (2014) Rapid embedding methods into epoxy and LR White resins for  
788 morphological and immunological analysis of cryofixed biological specimens. *Microsc*  
789 *Microanal* 20:152–163. doi: 10.1017/S1431927613013846  
790  
791
